# Supplementary material for: Nuclear restriction of HIV-1 infection by SUN1
Source: PubMed Central journal article supplement (PMC8476499; doi:10.1038/s41598-021-98541-4), 2021-09-27

Figure 2B

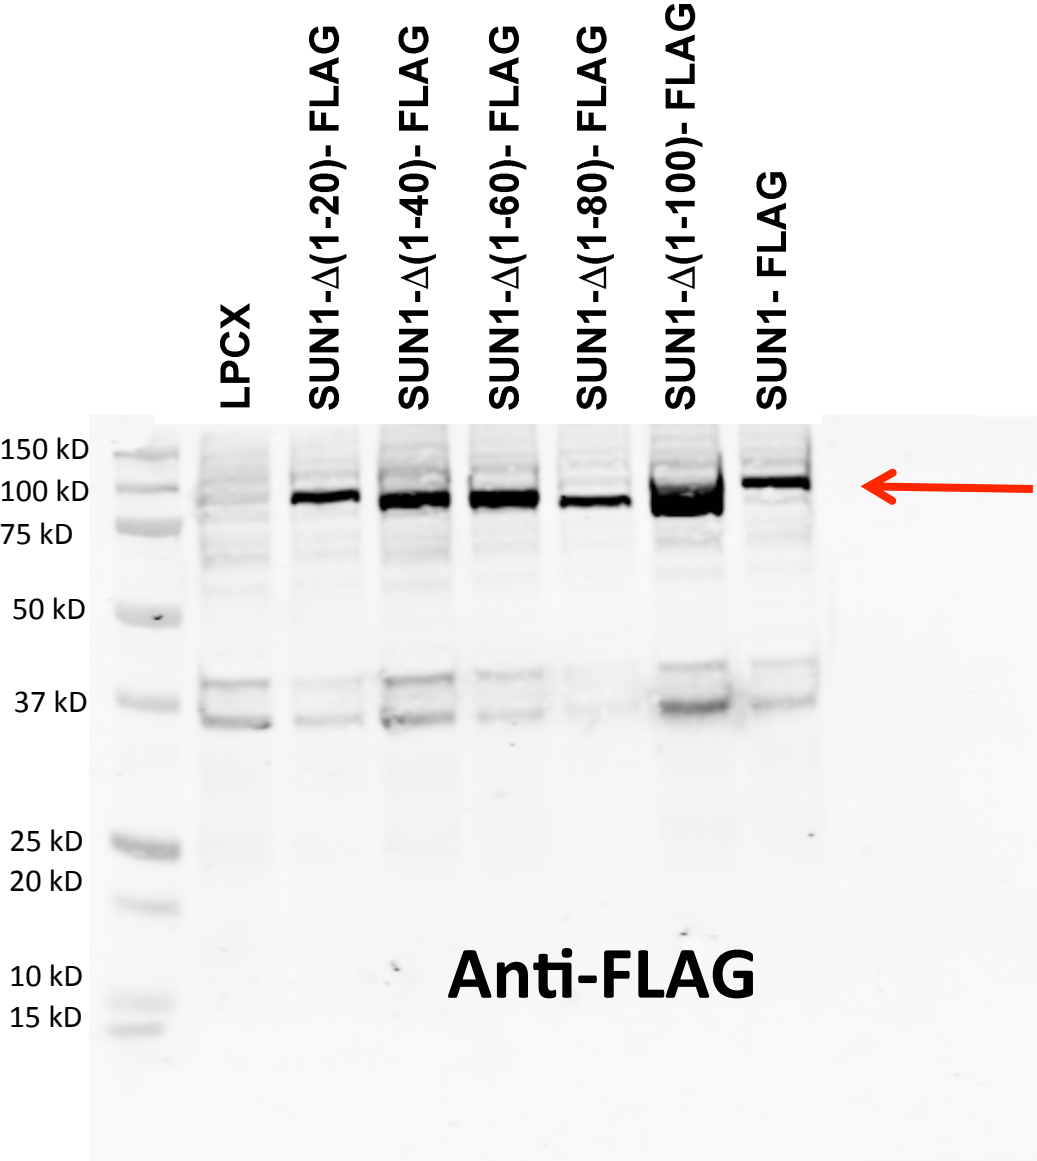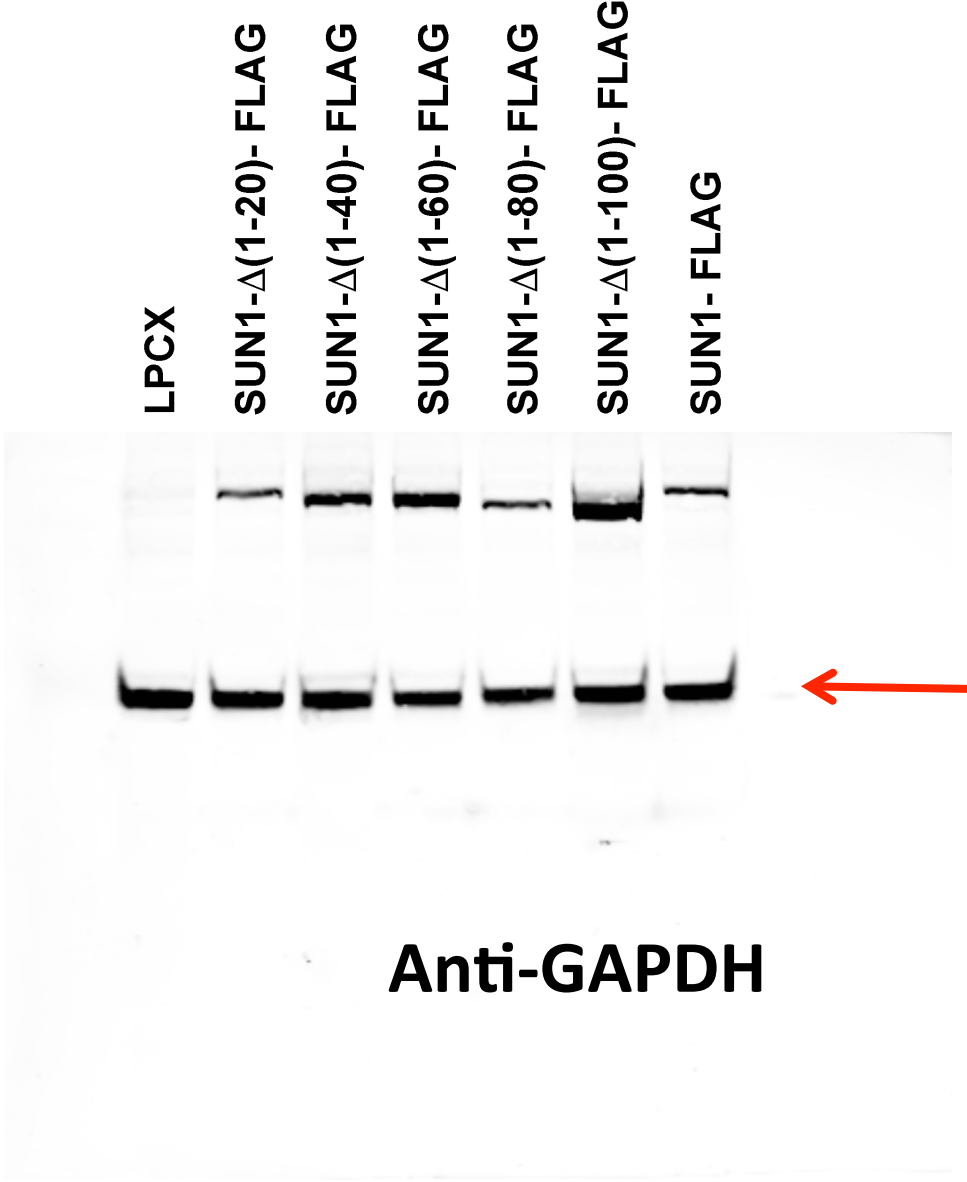

Figure 3

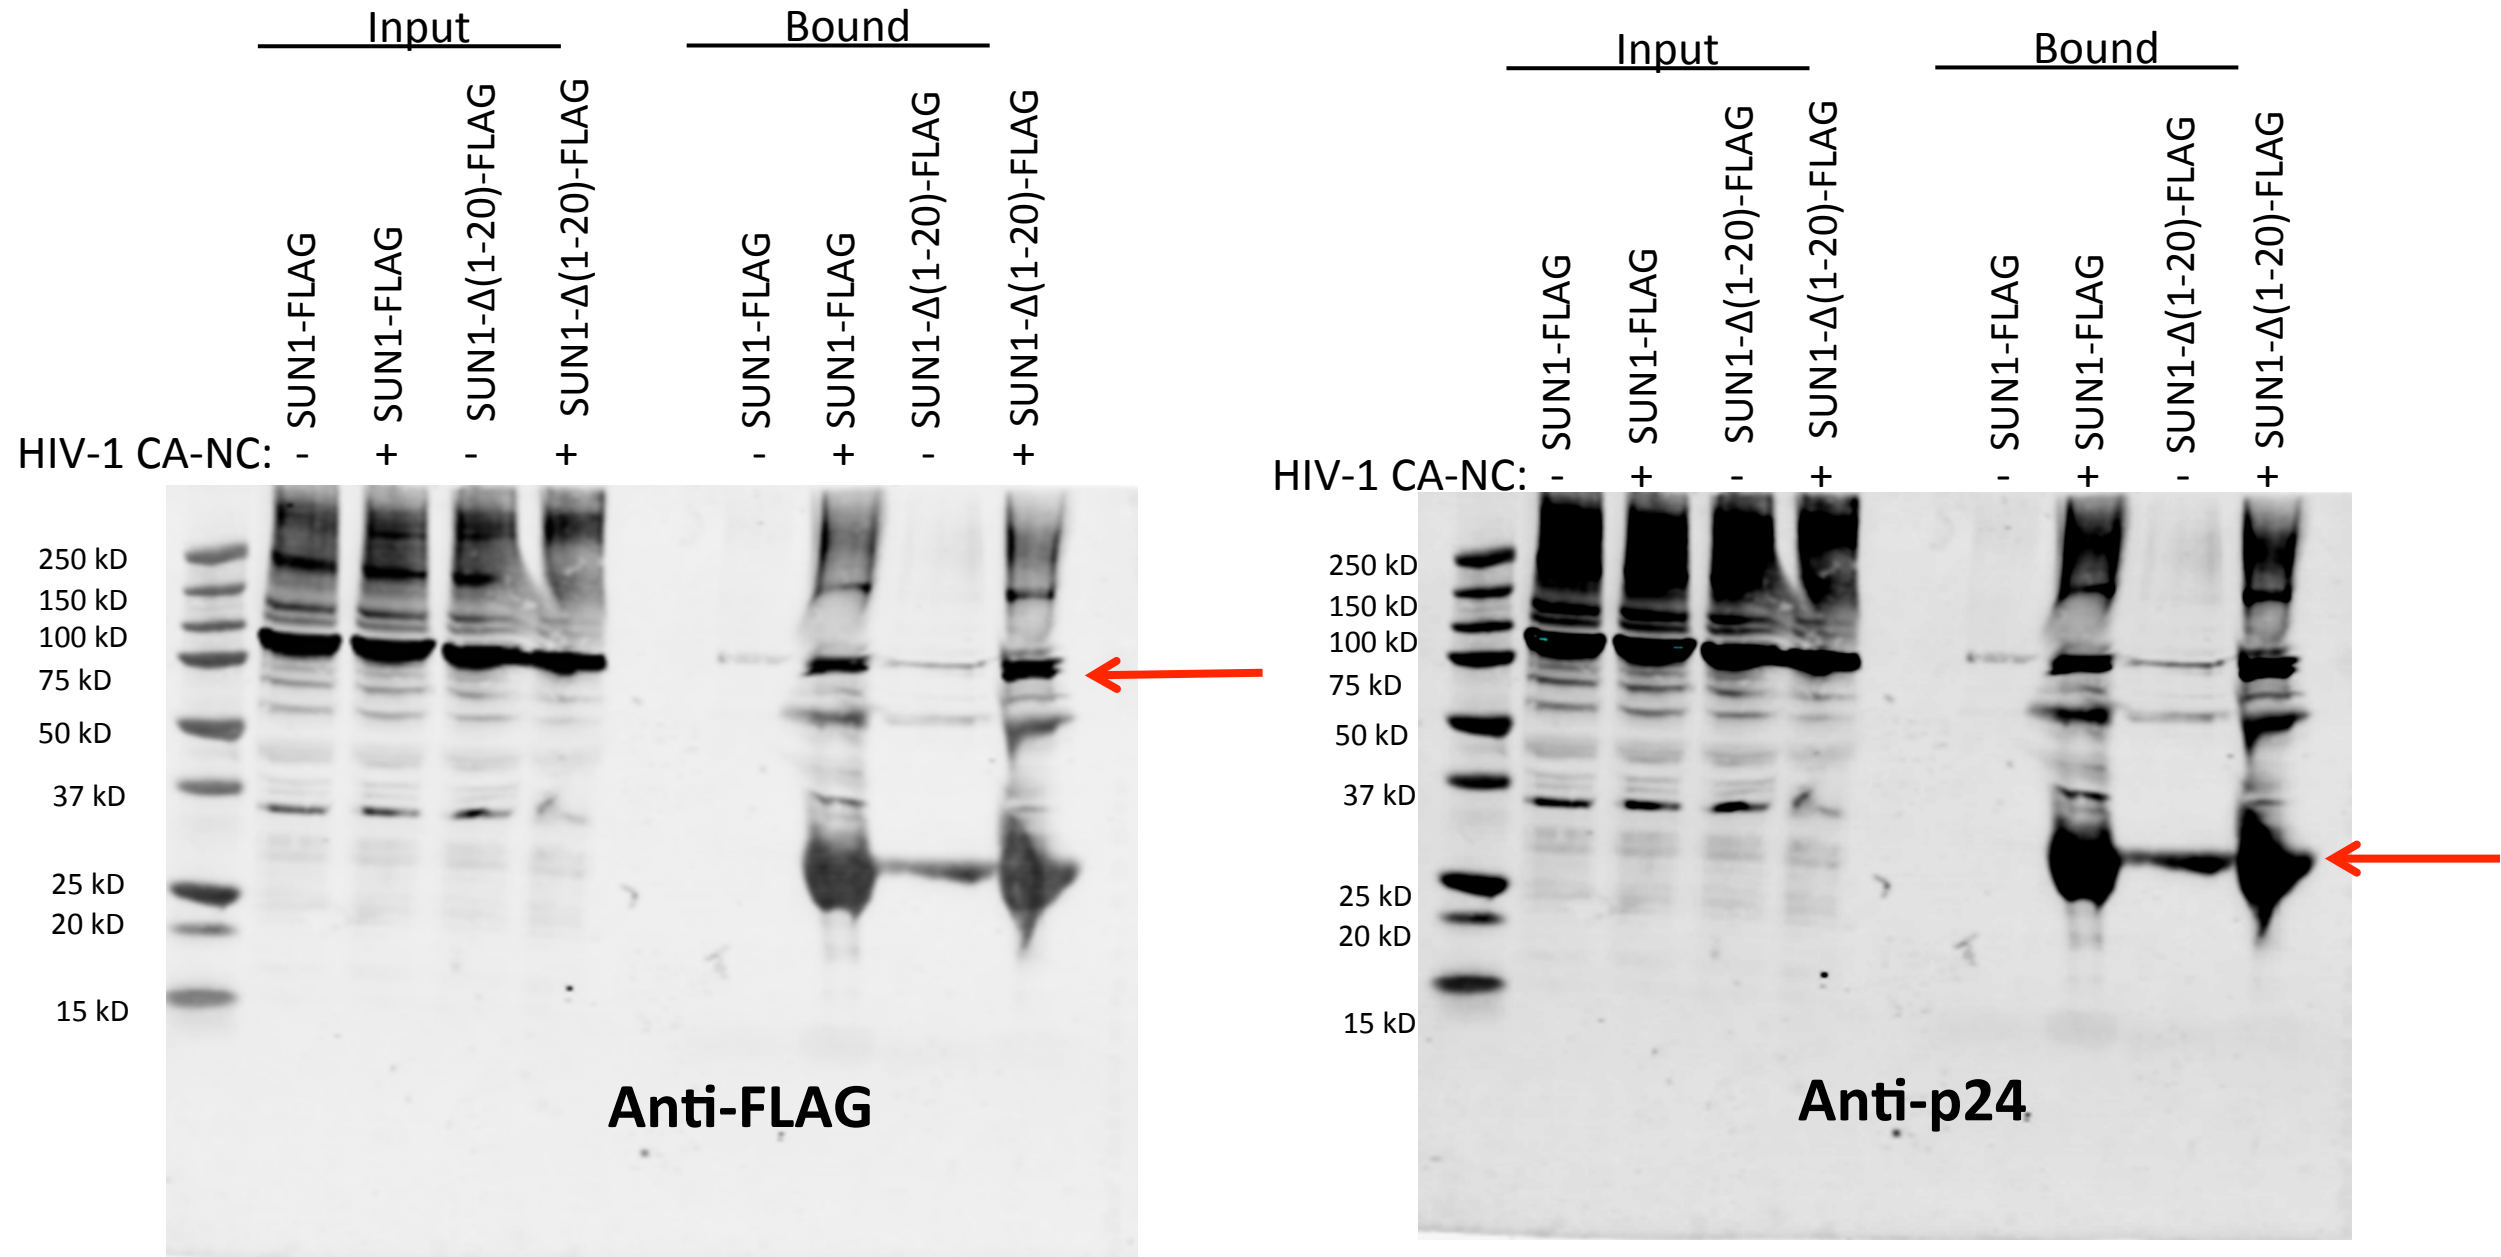

Figure 3

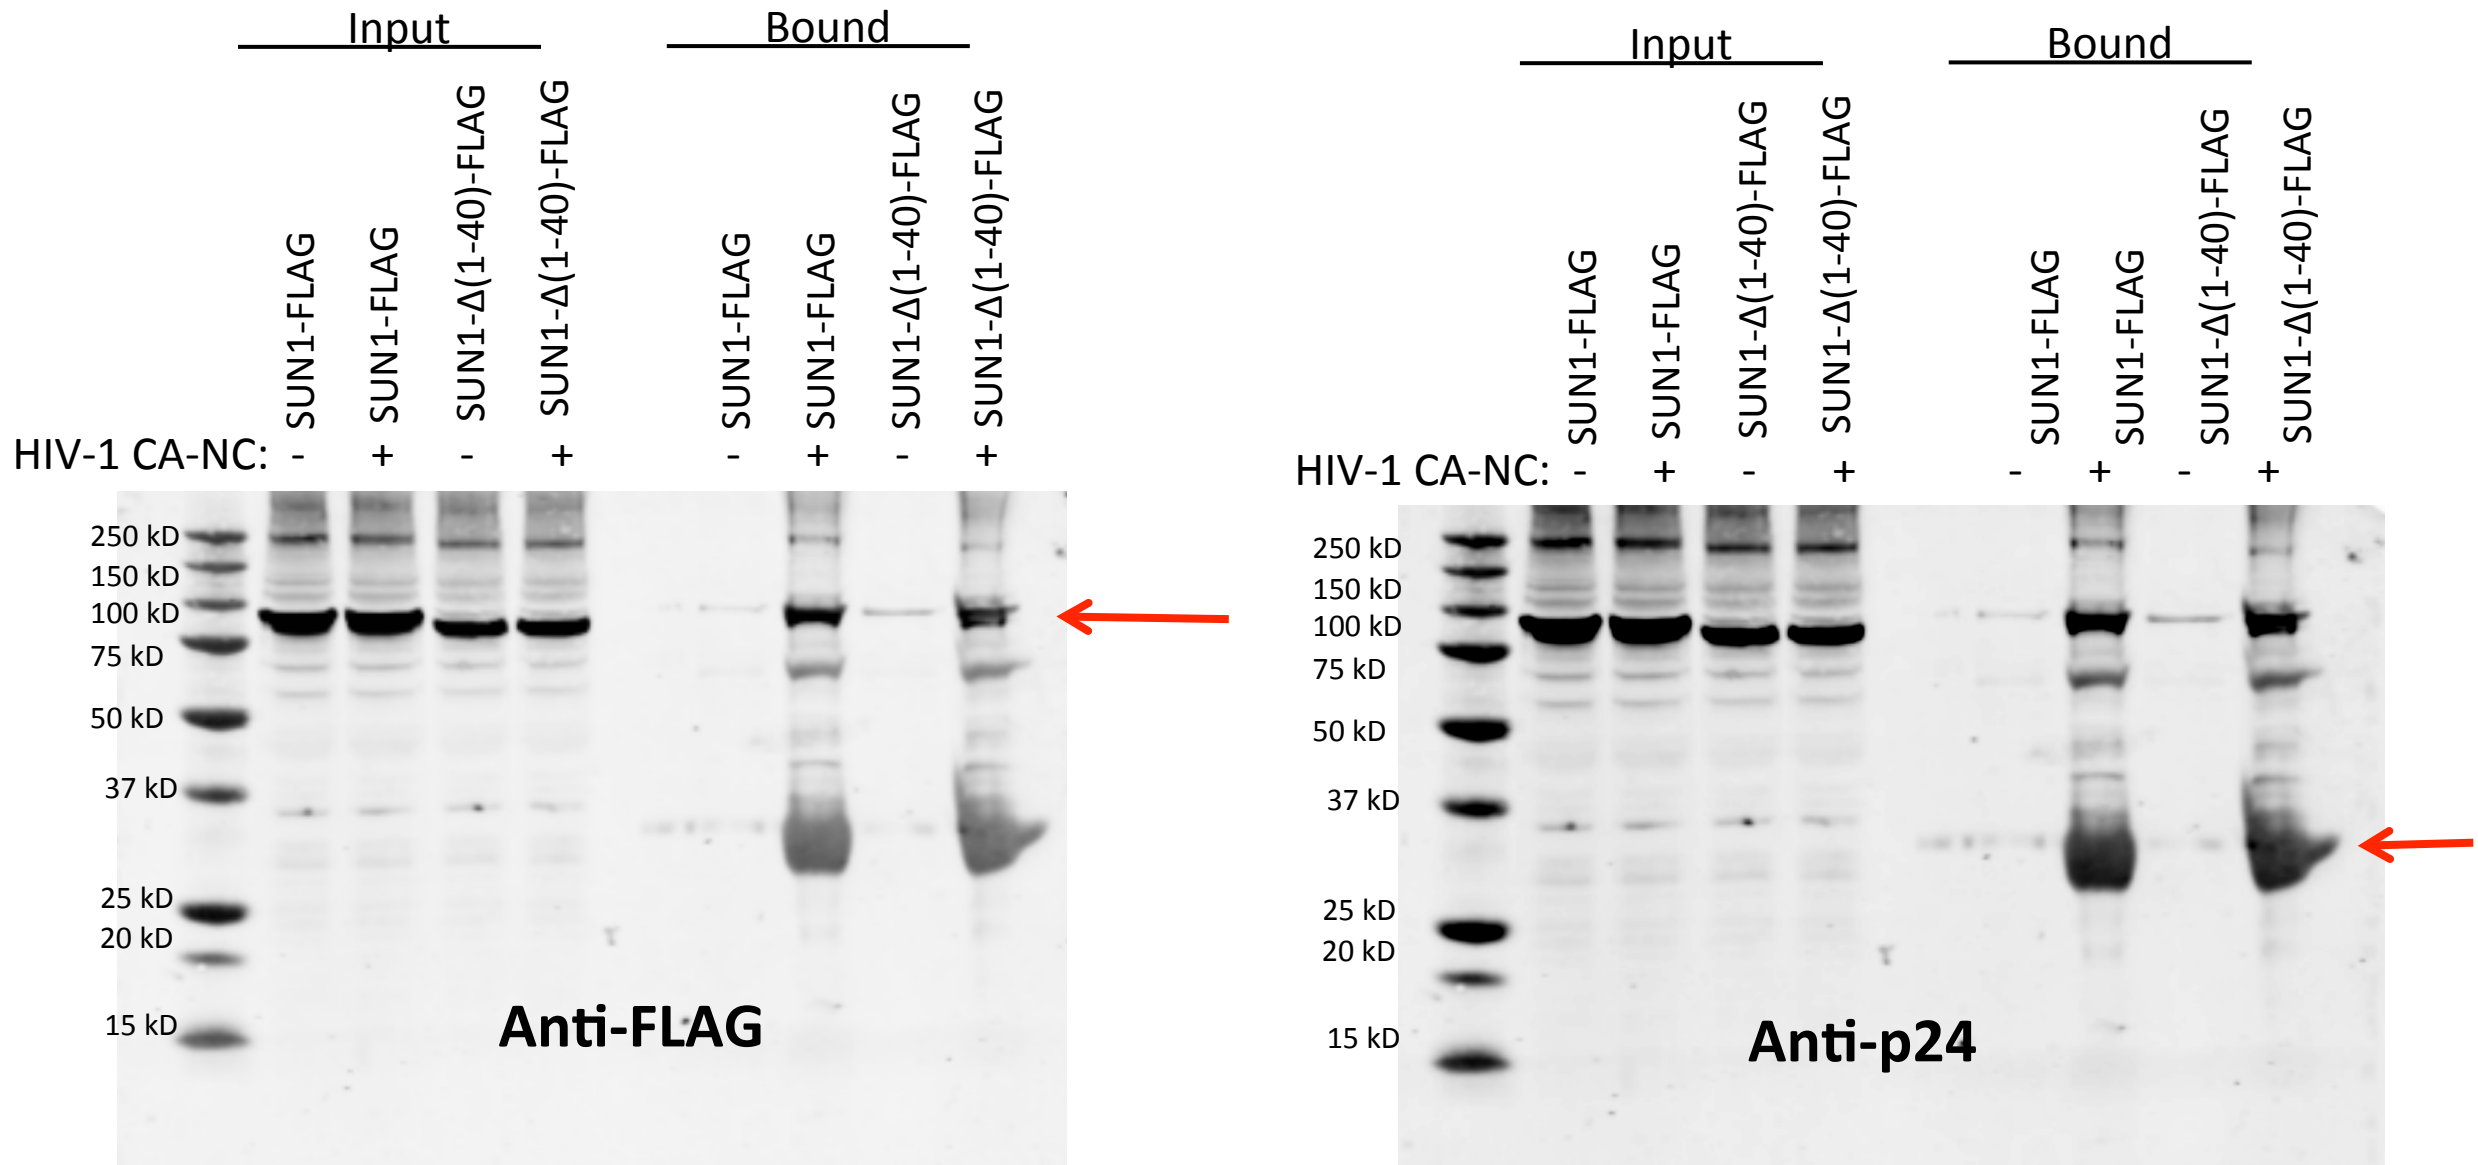

Figure 3

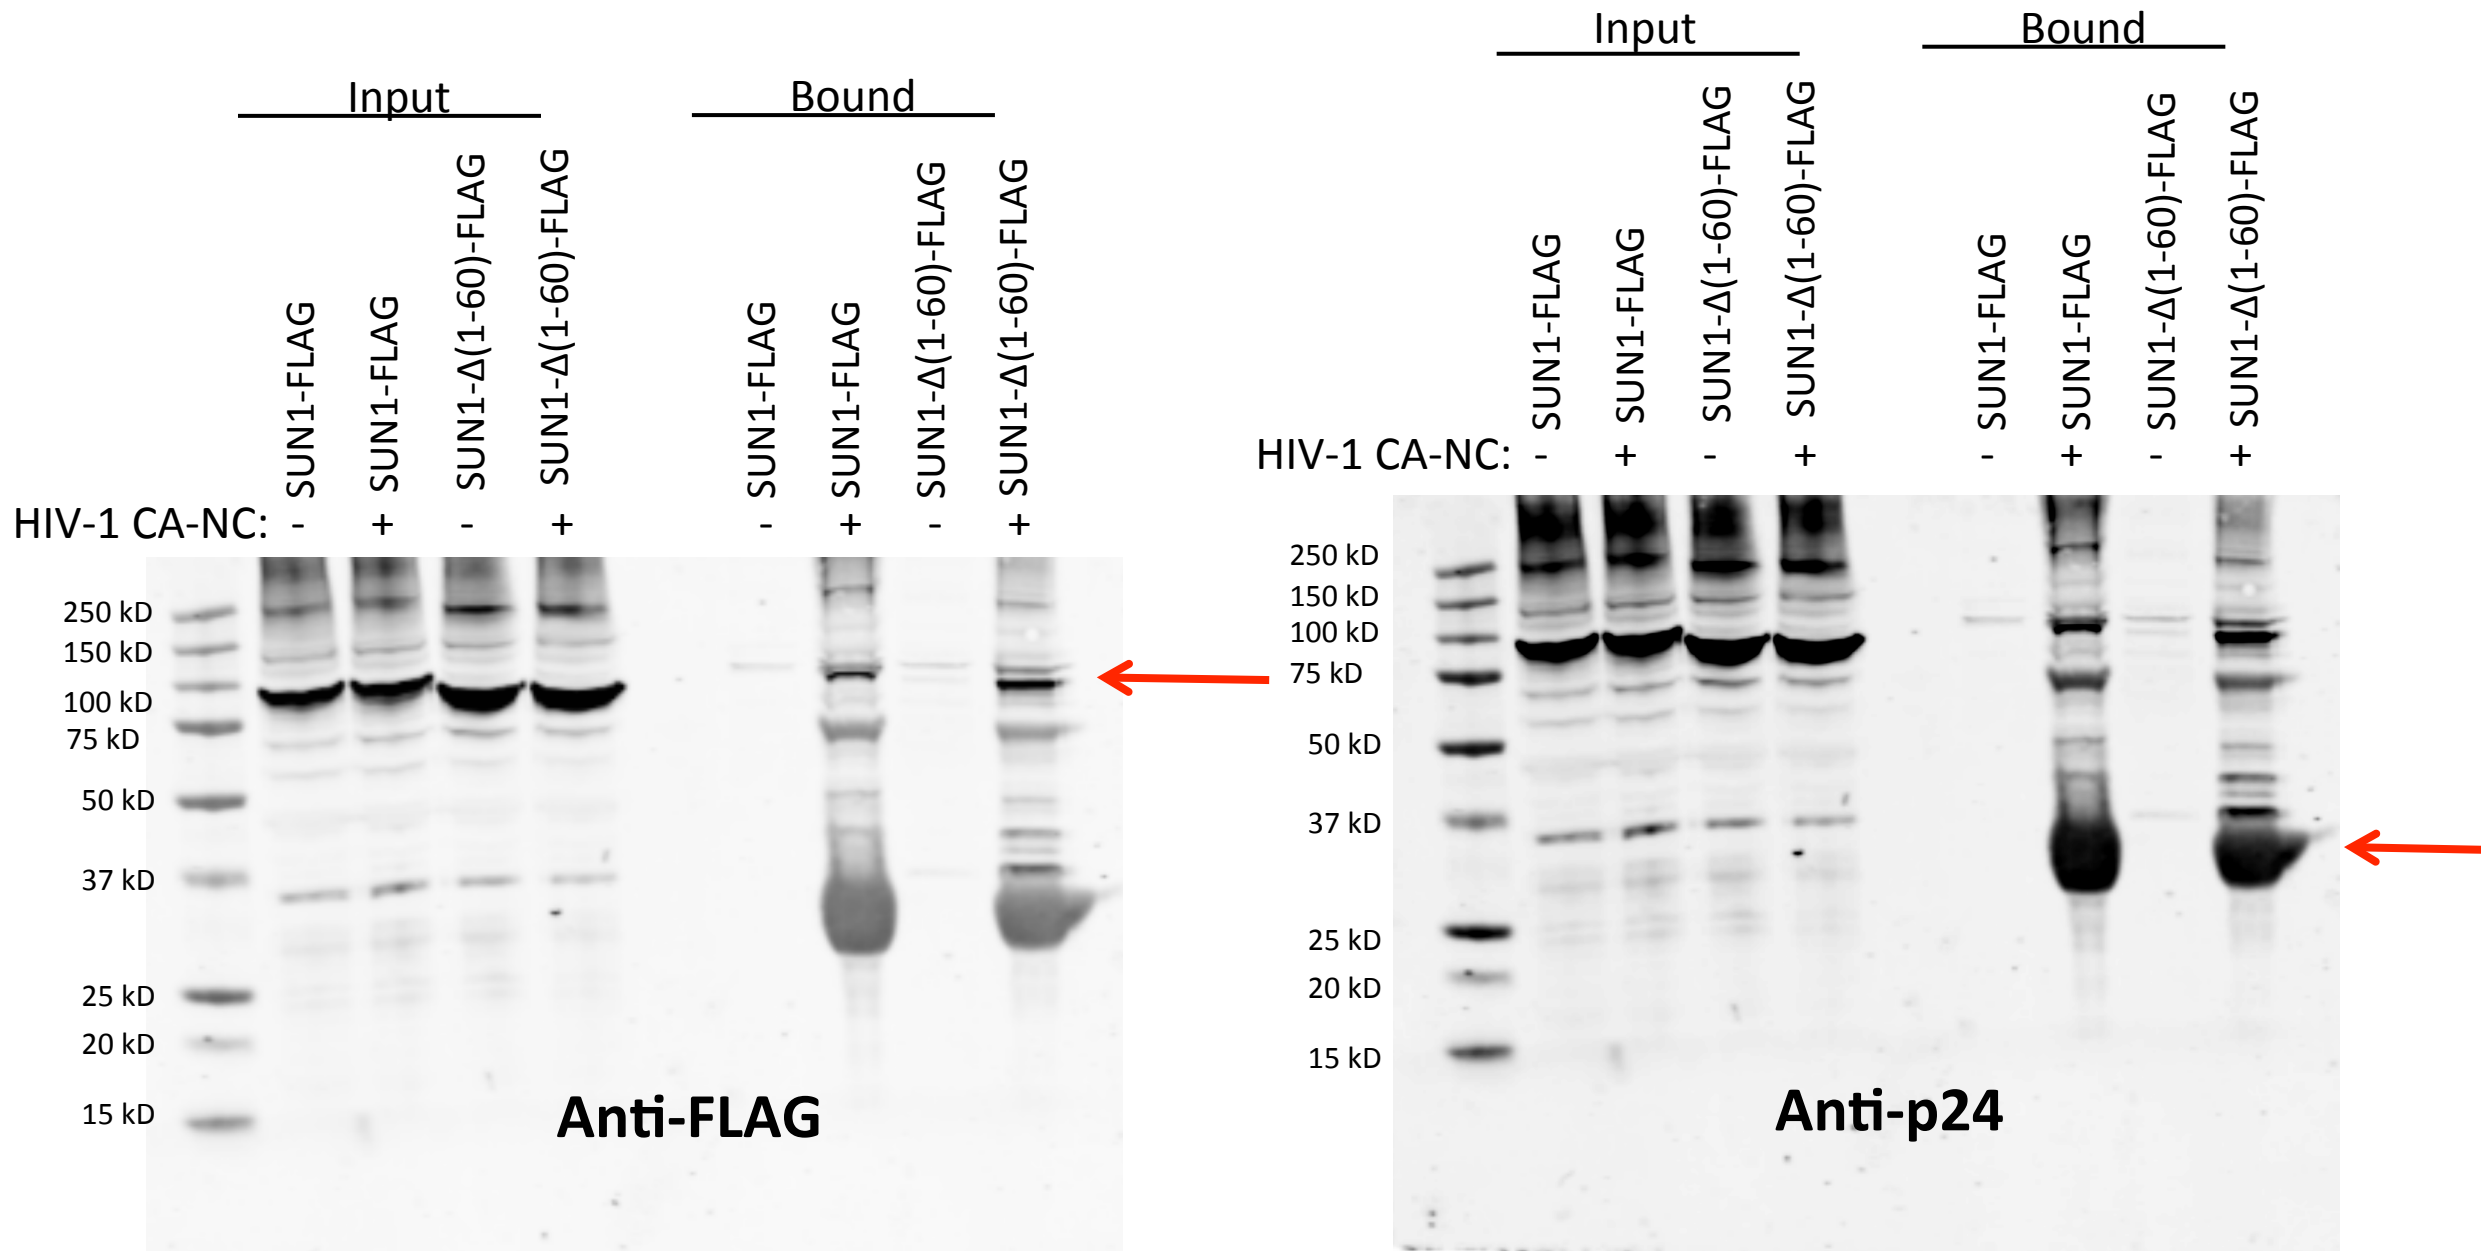

Figure 3

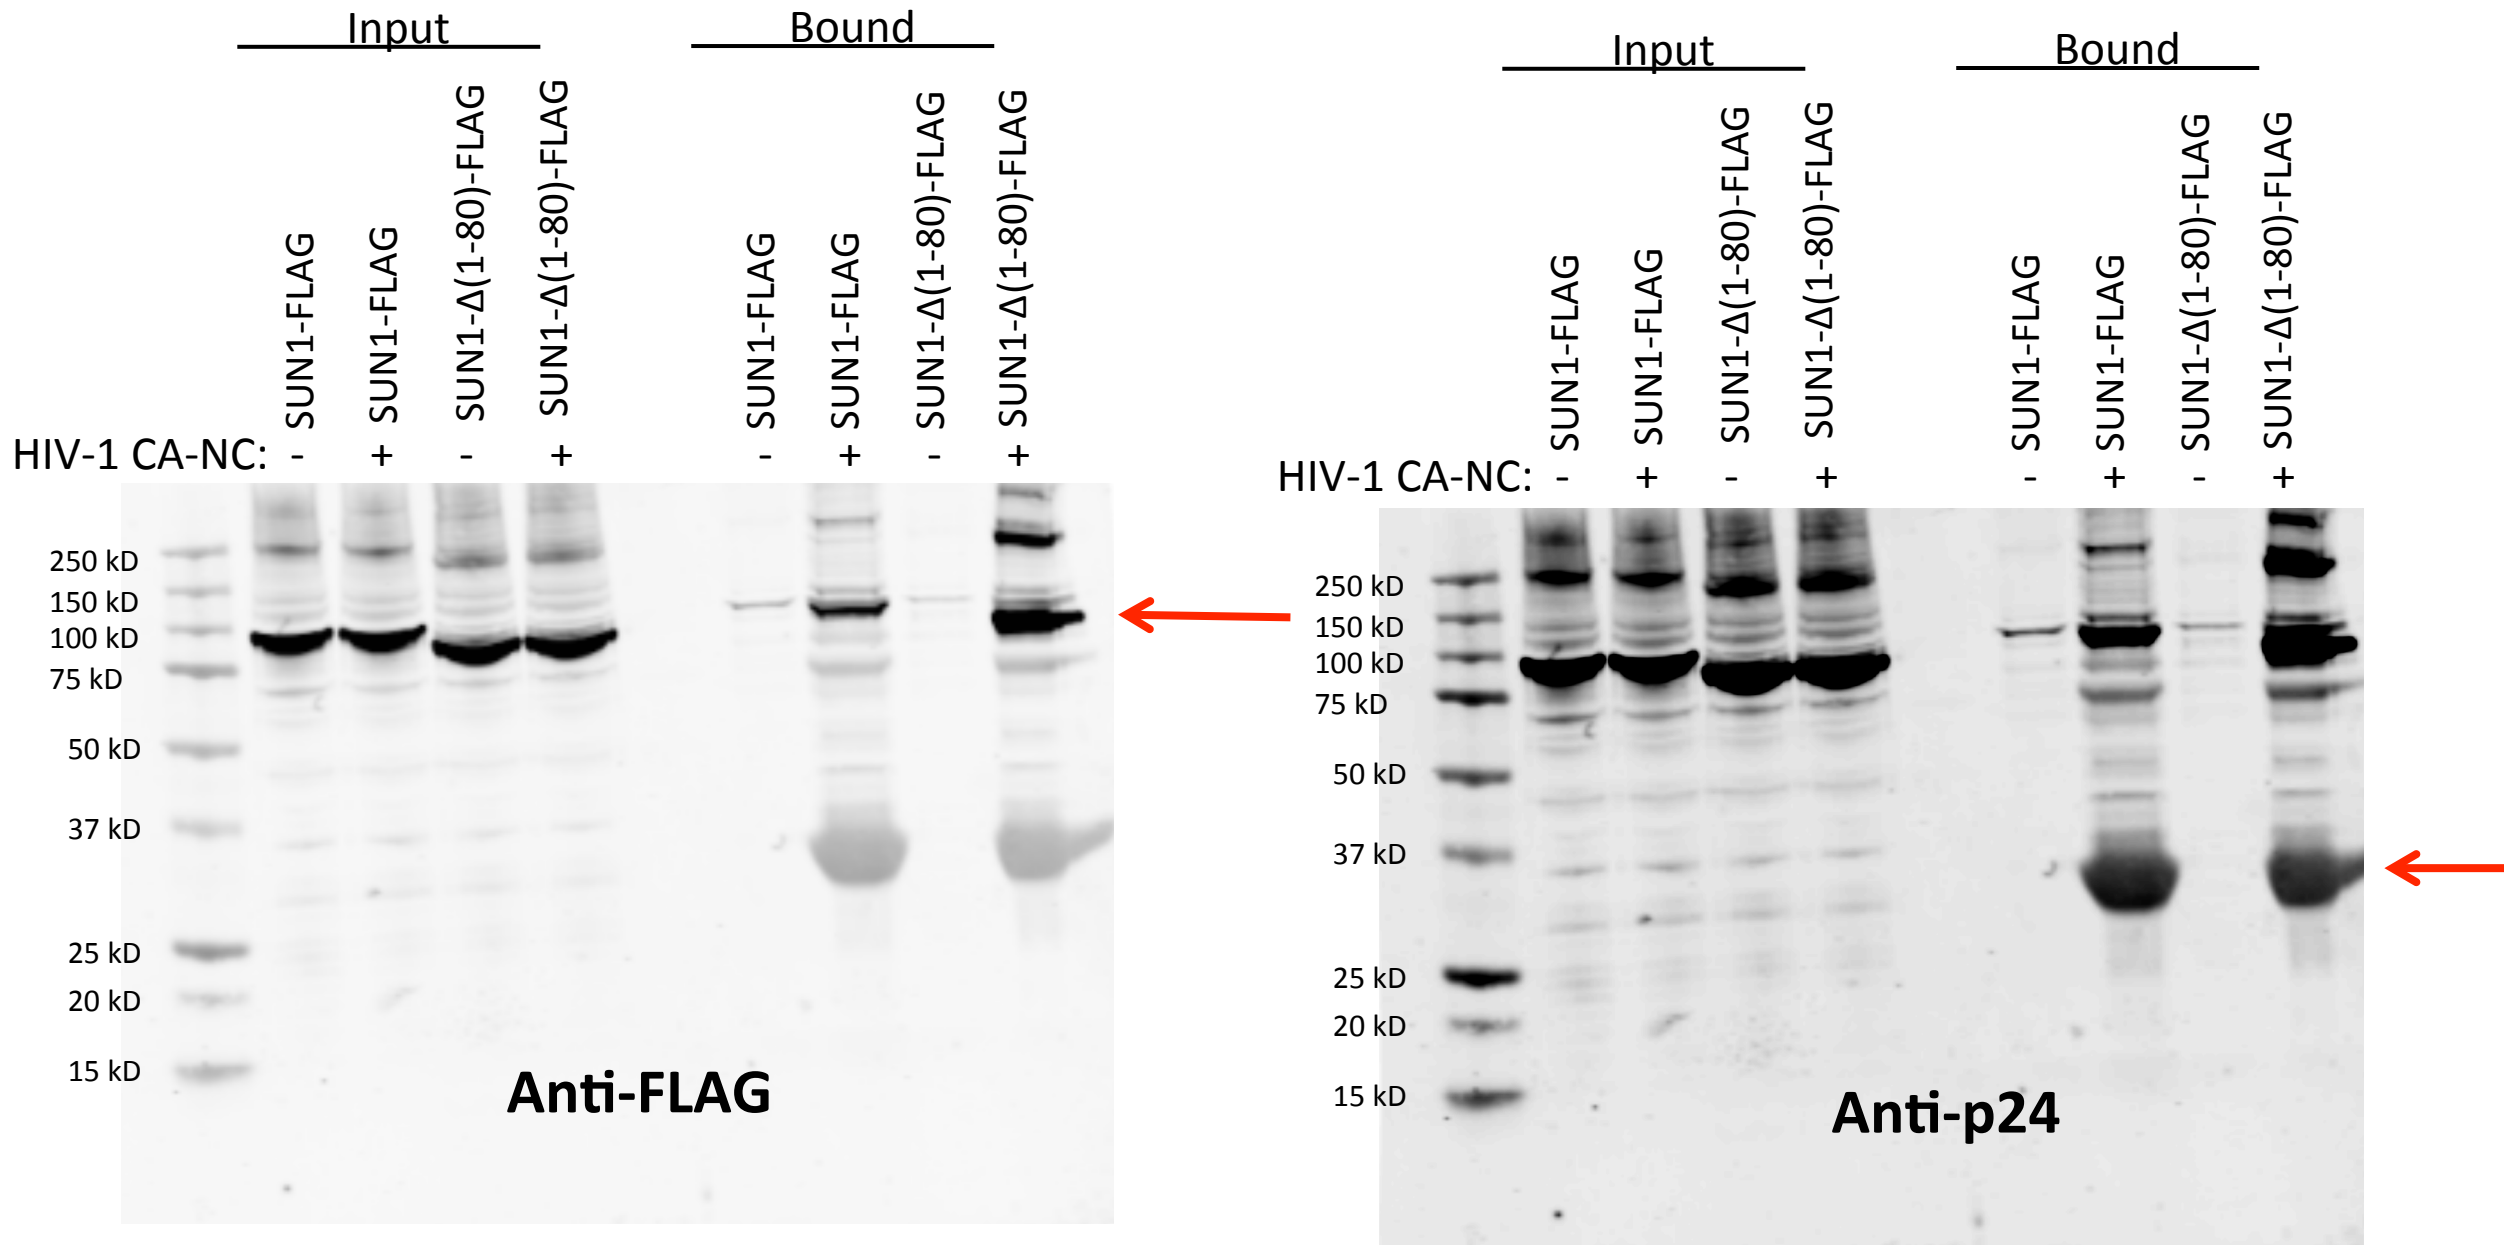

Figure 3

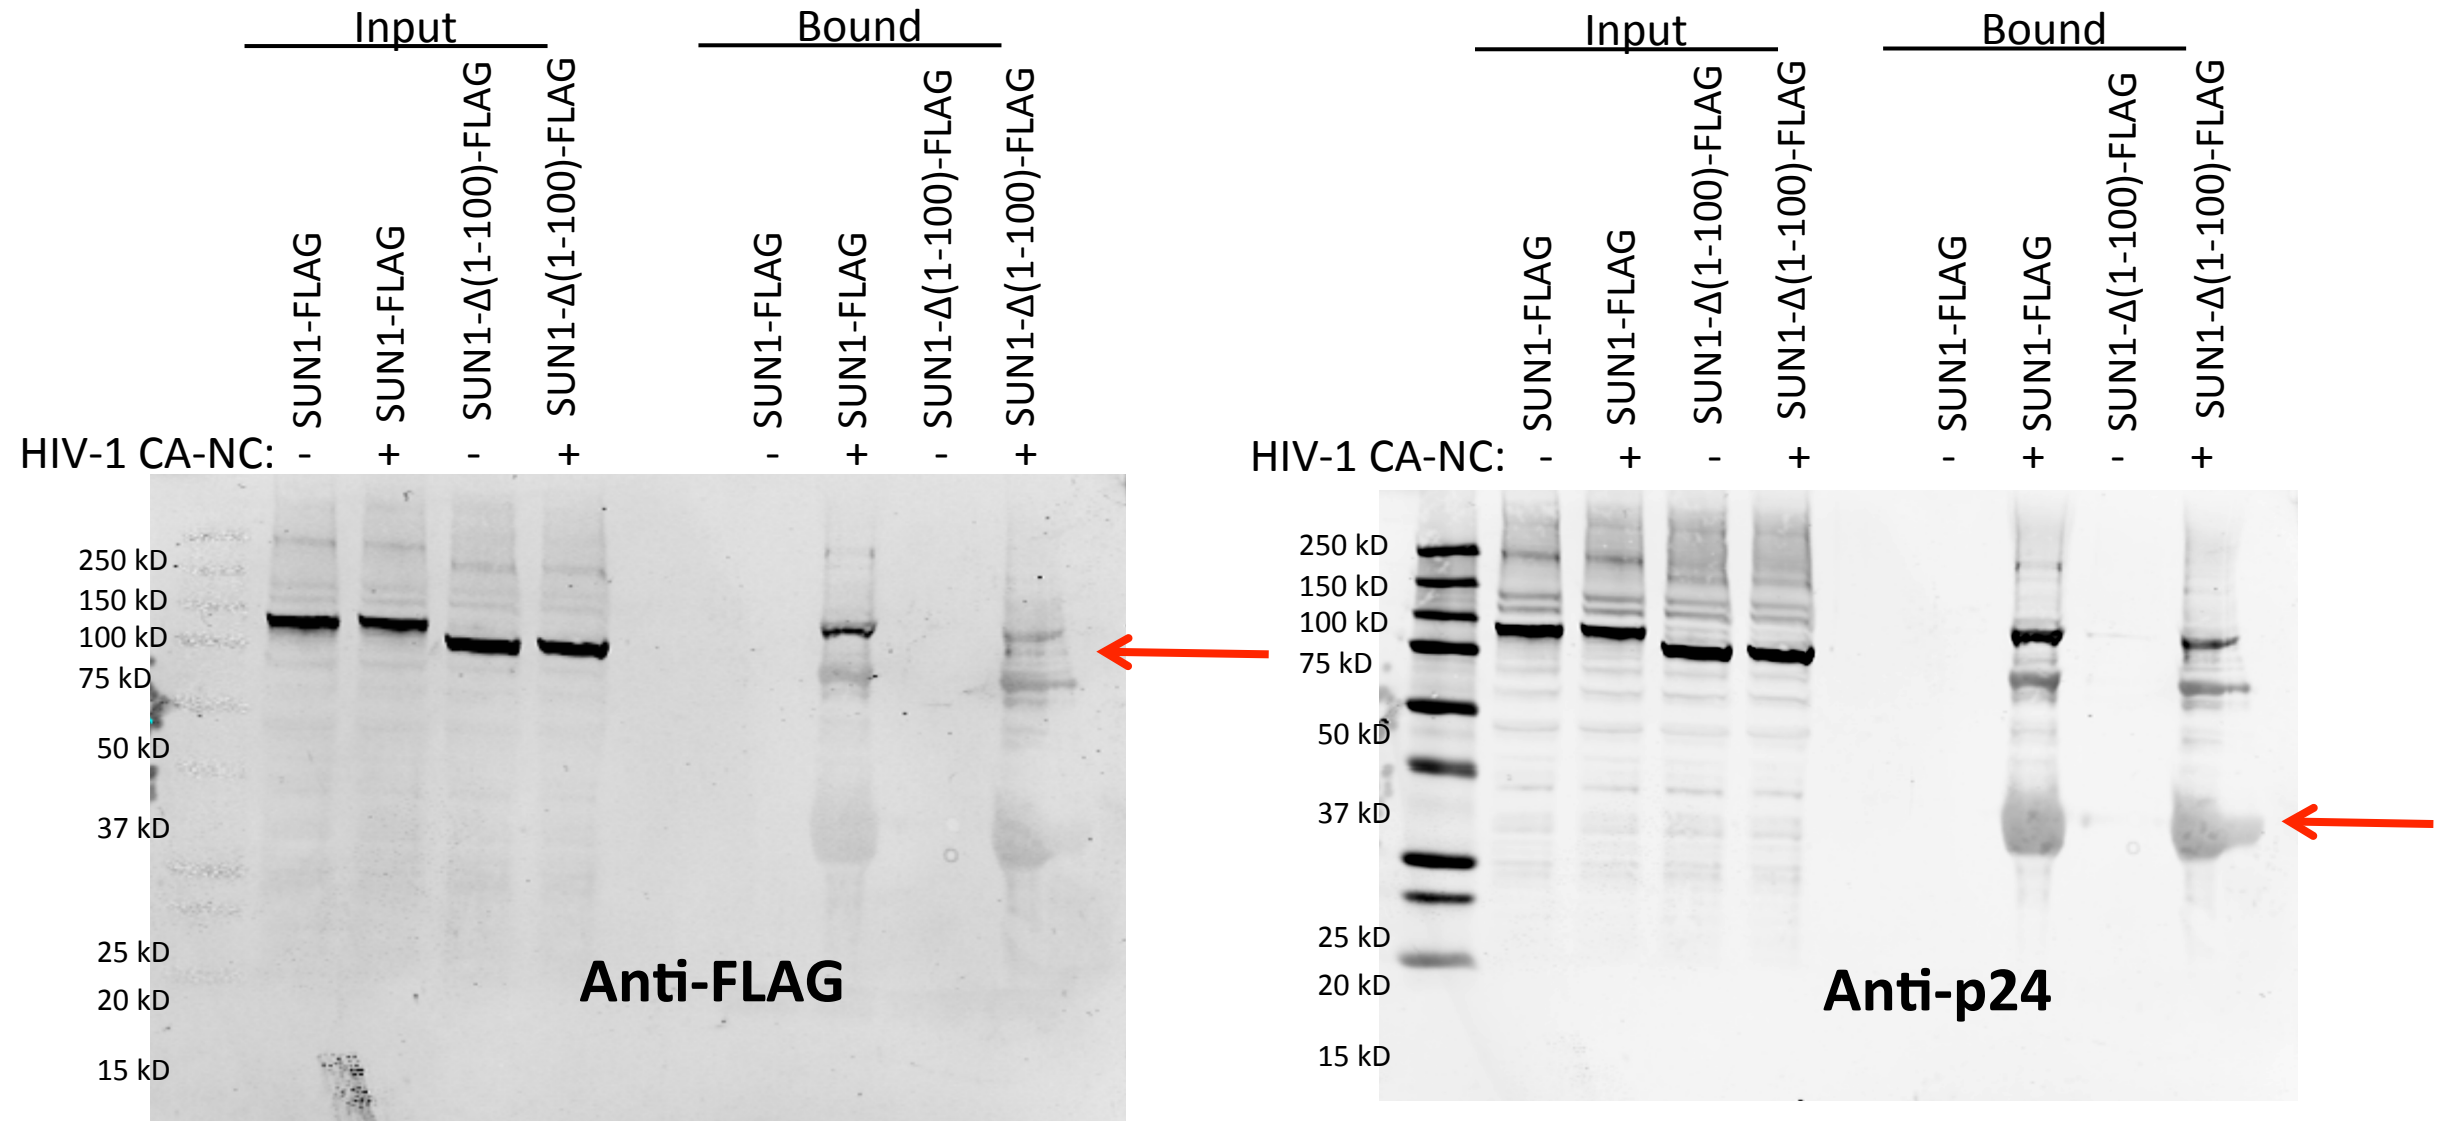

Figure 5B

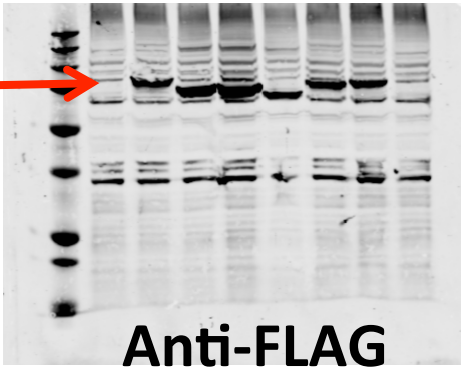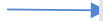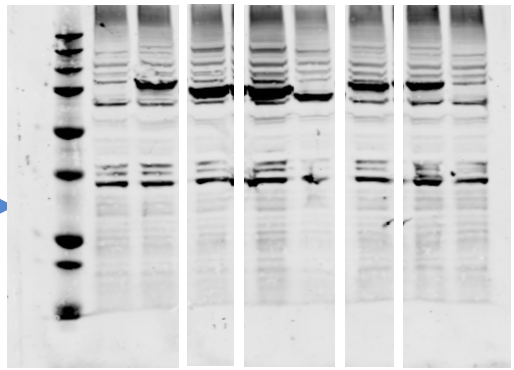

OUT

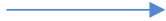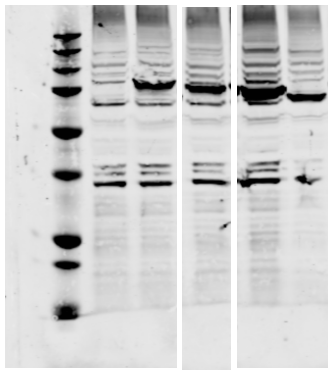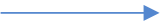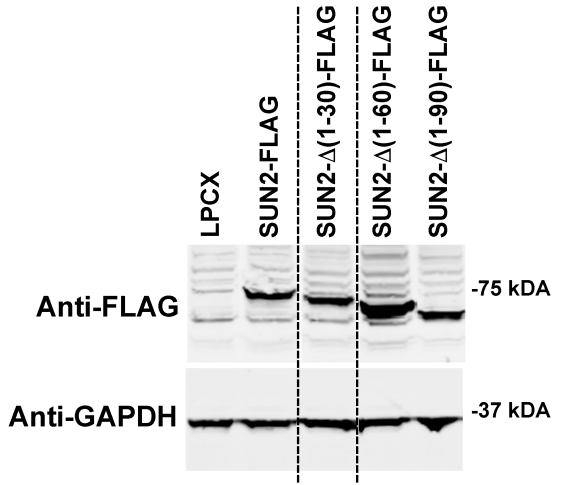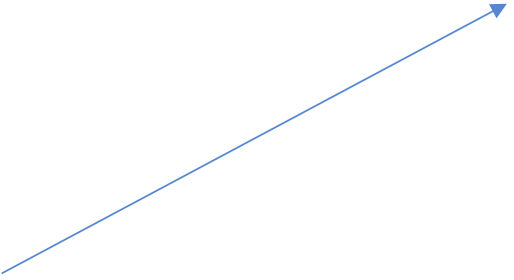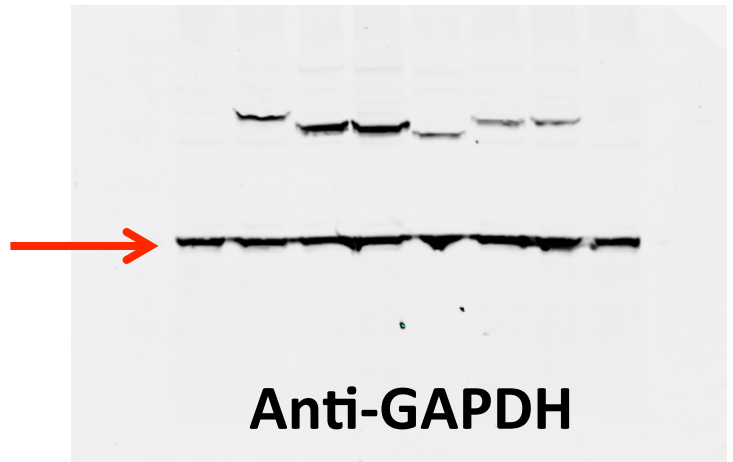

Figure 6

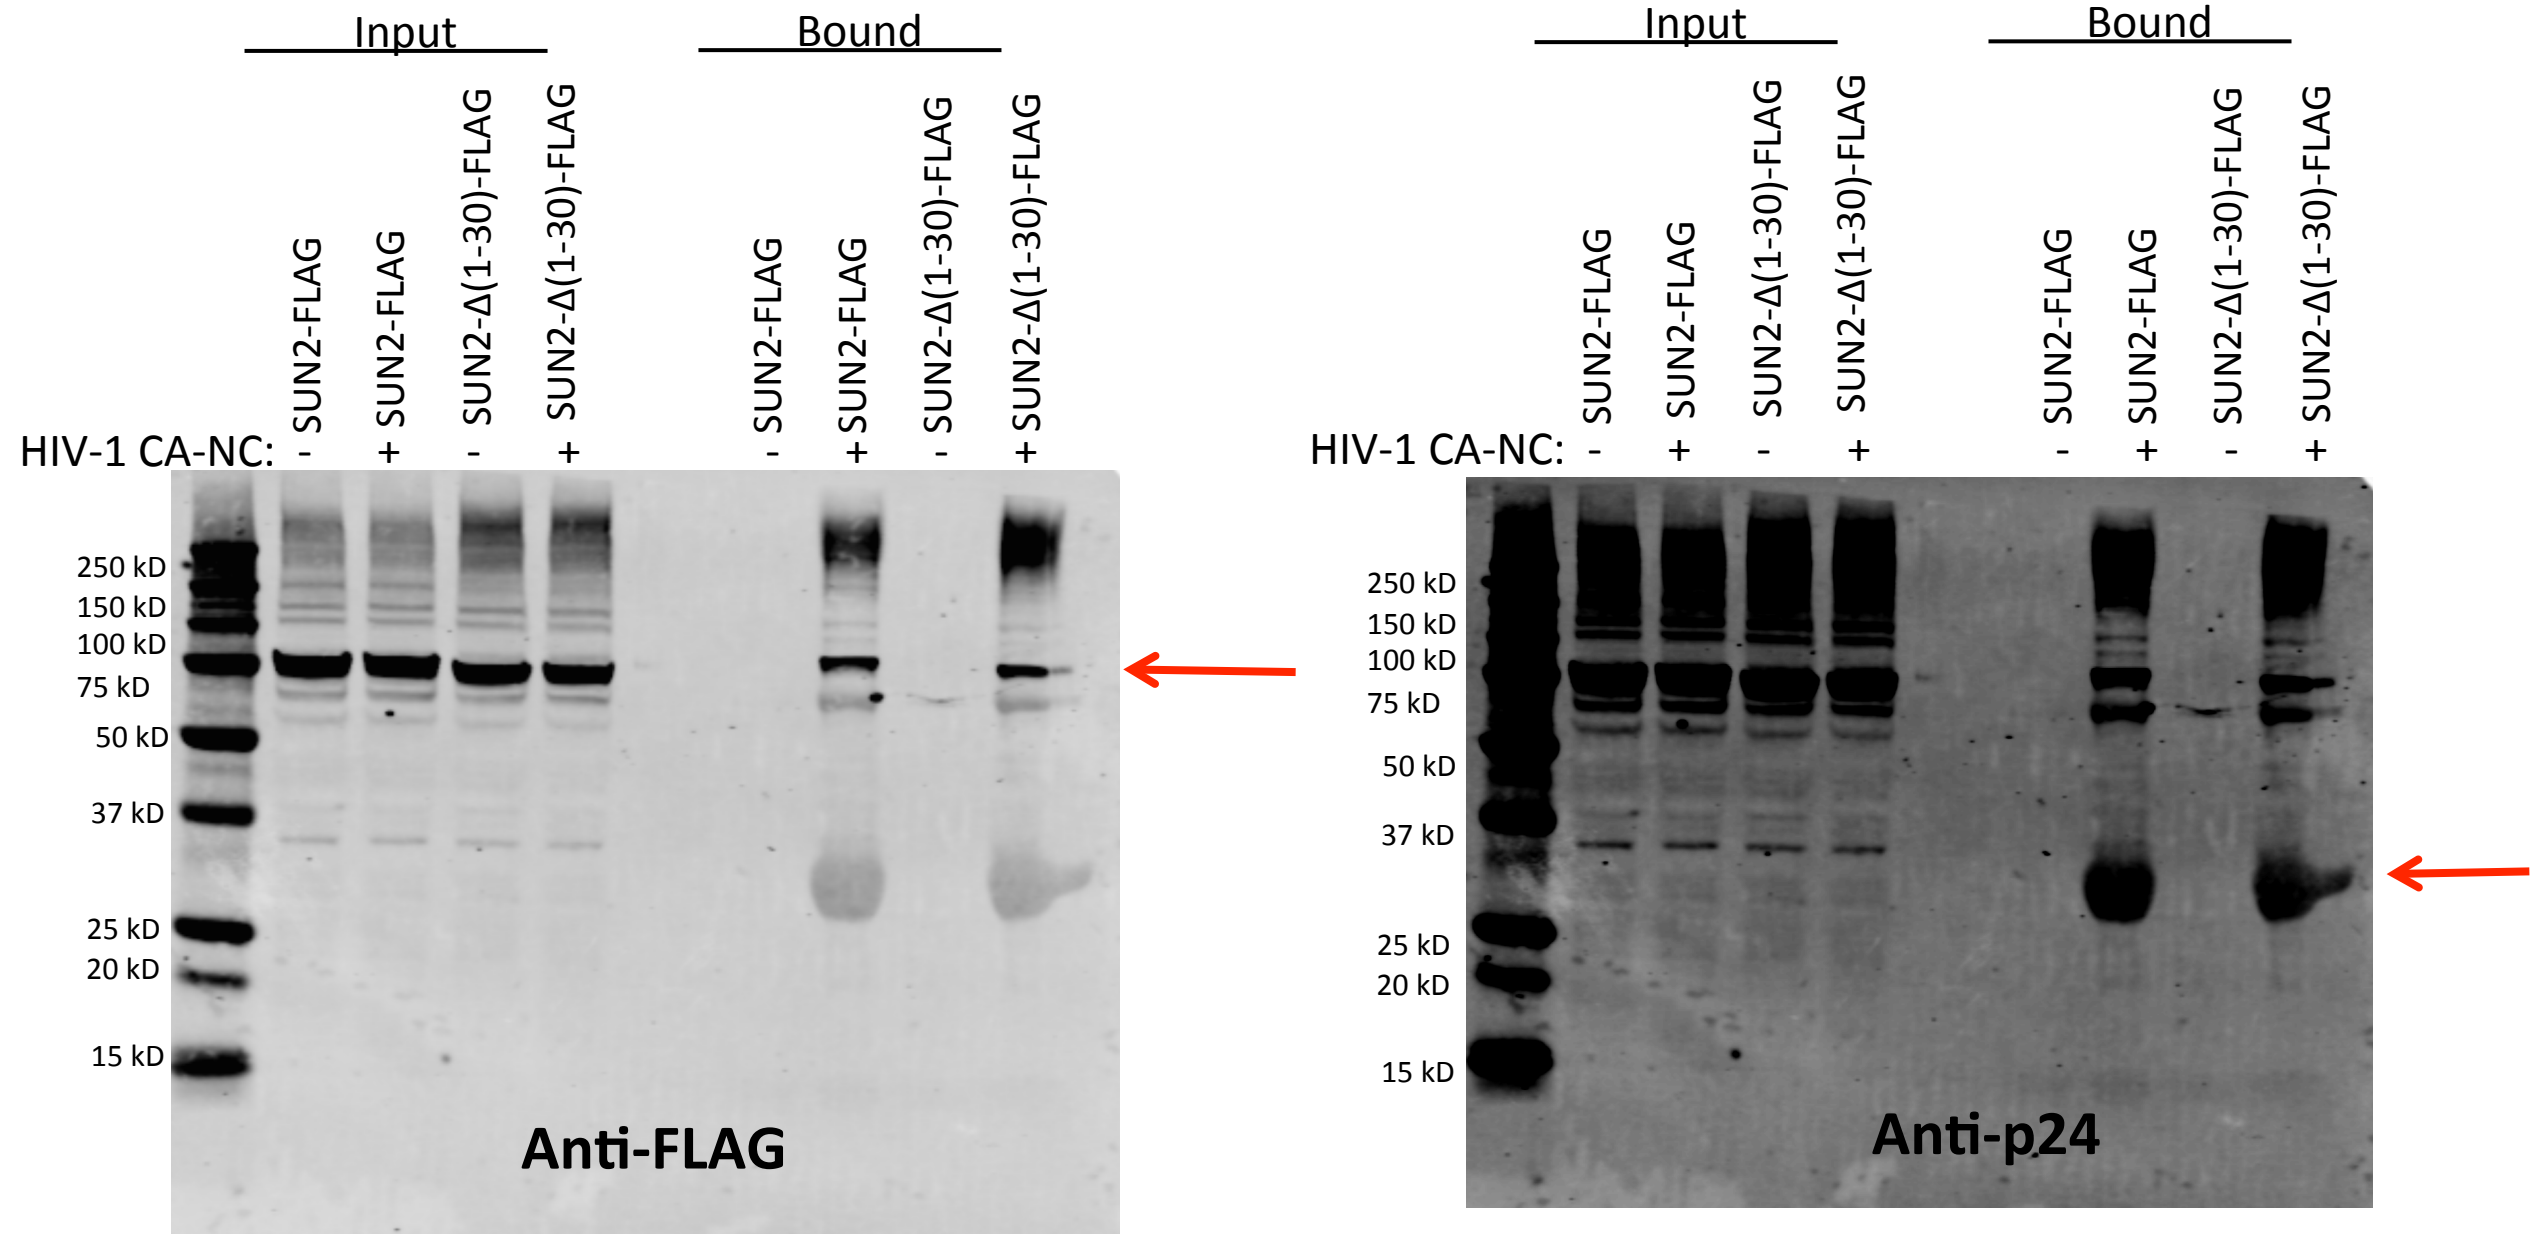



Figure 6

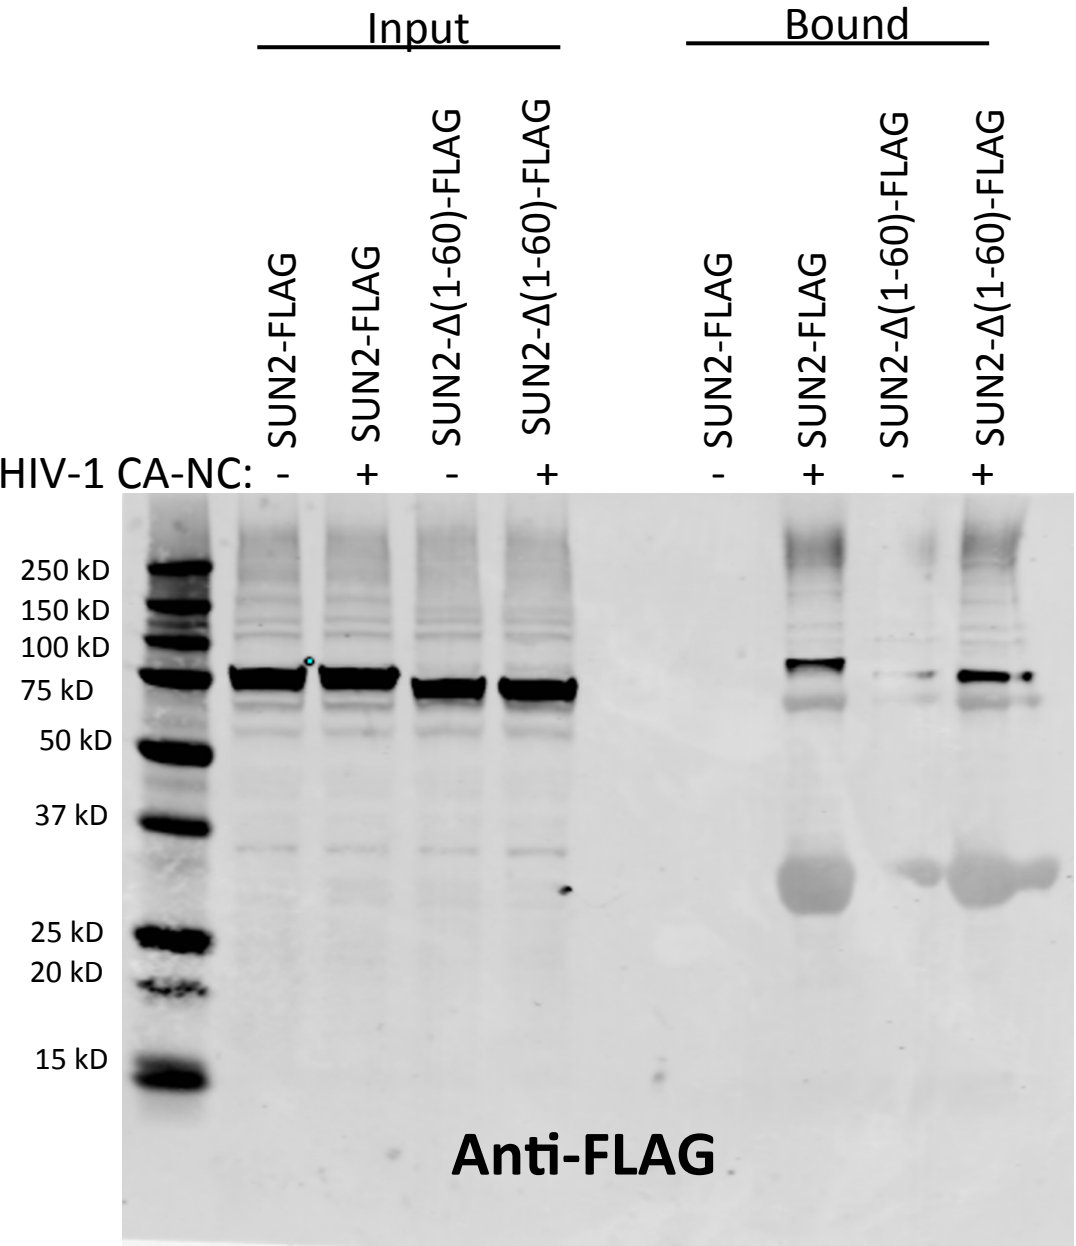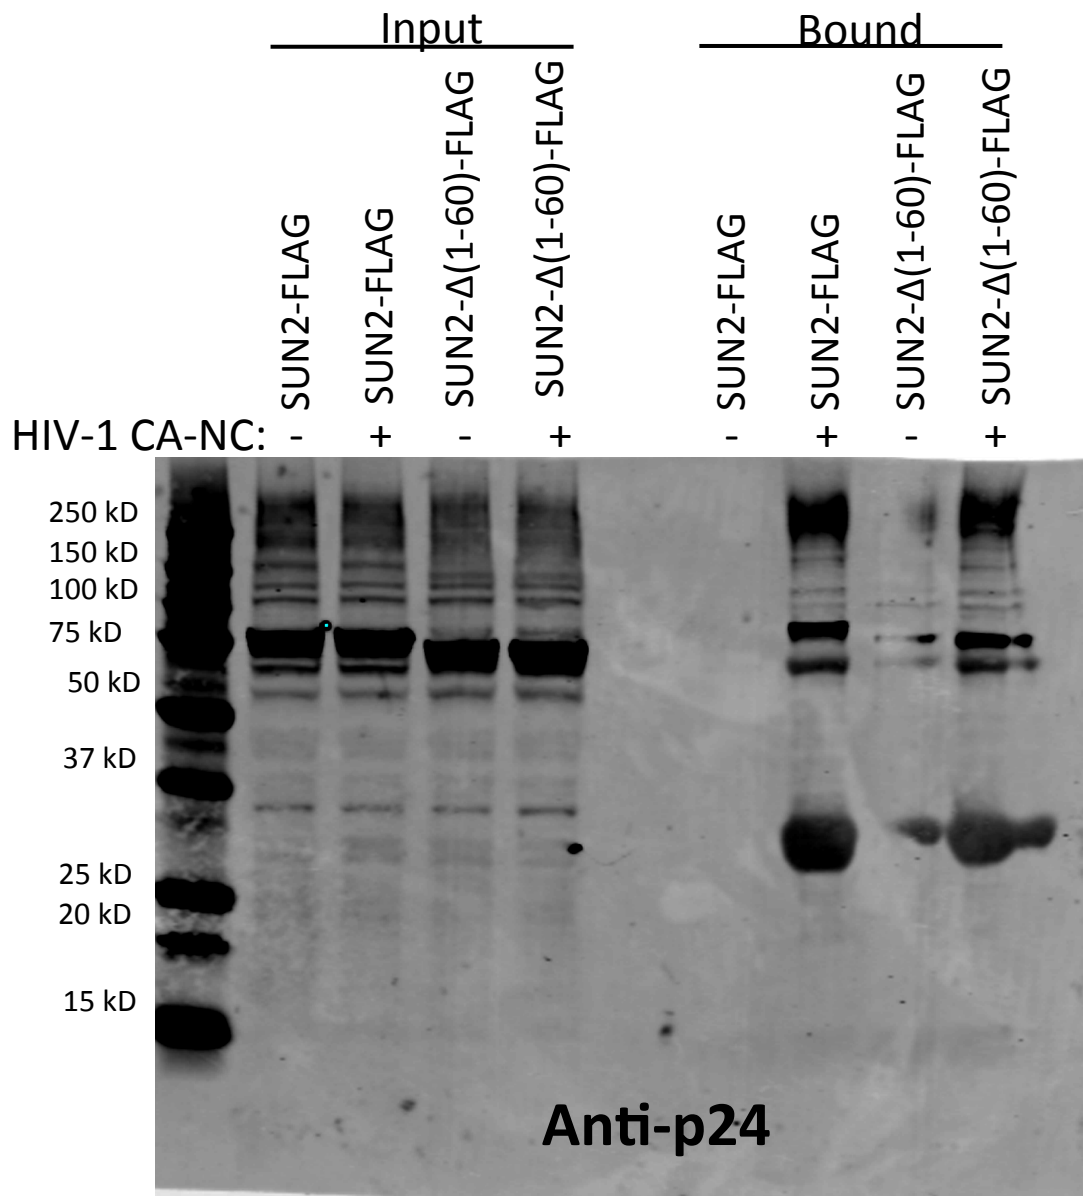

Figure 6

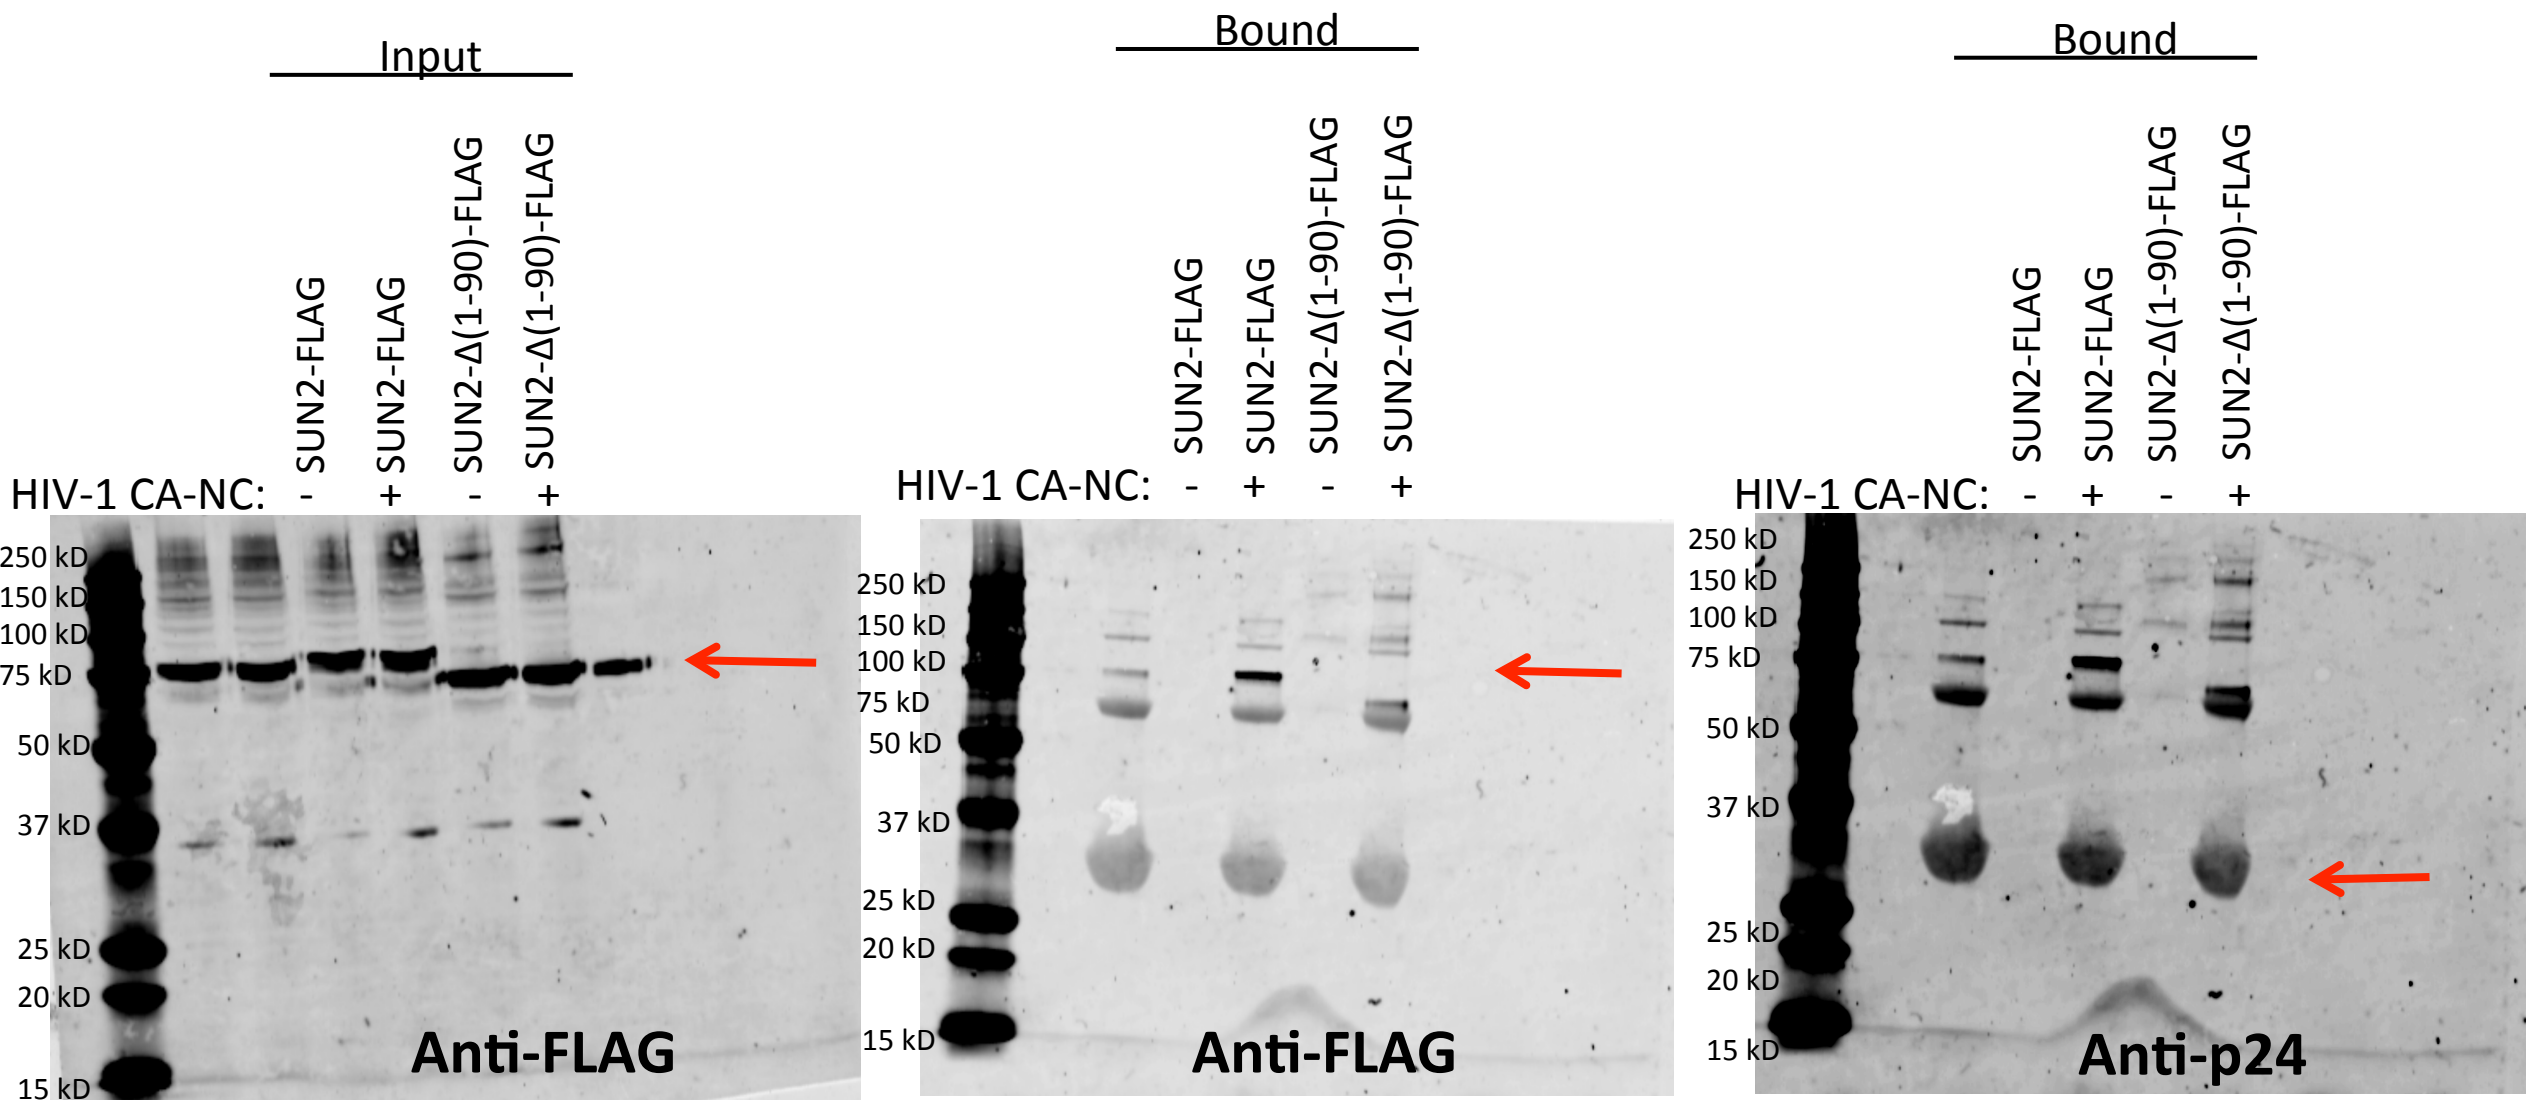

Figure 7A

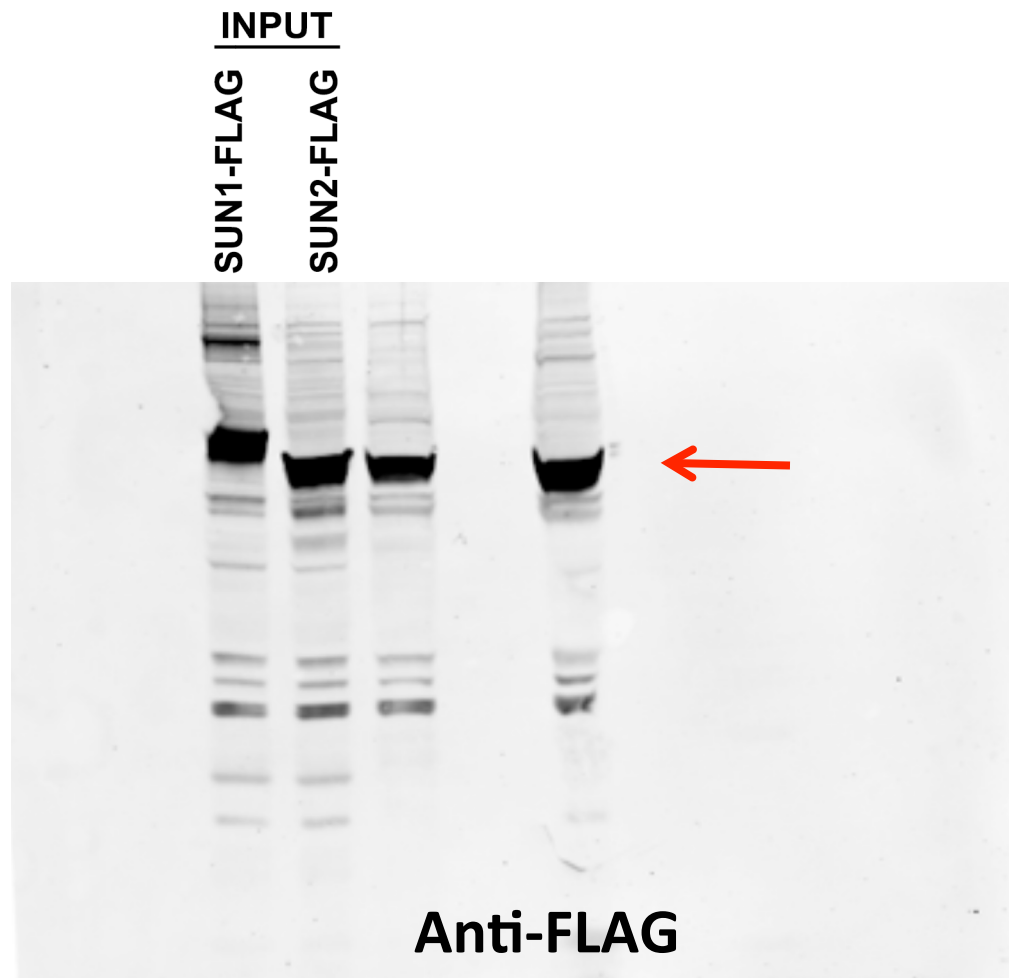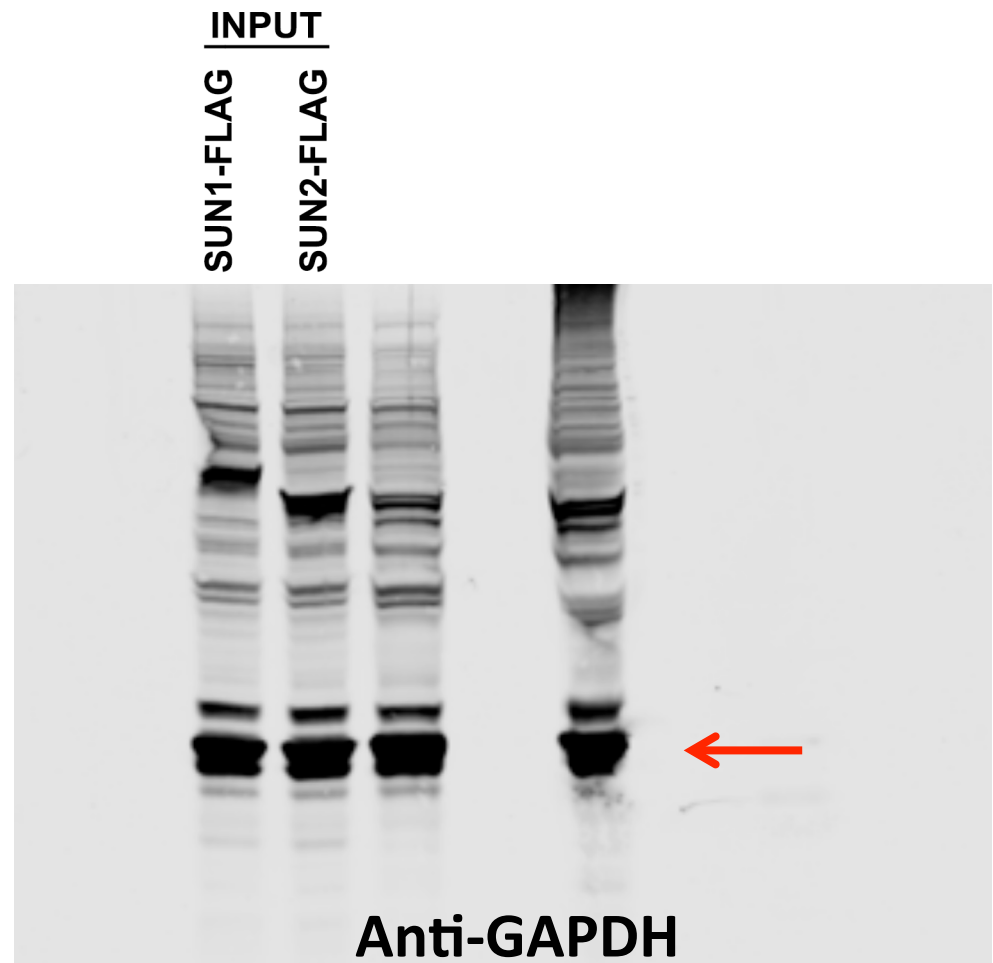

Figure 7A

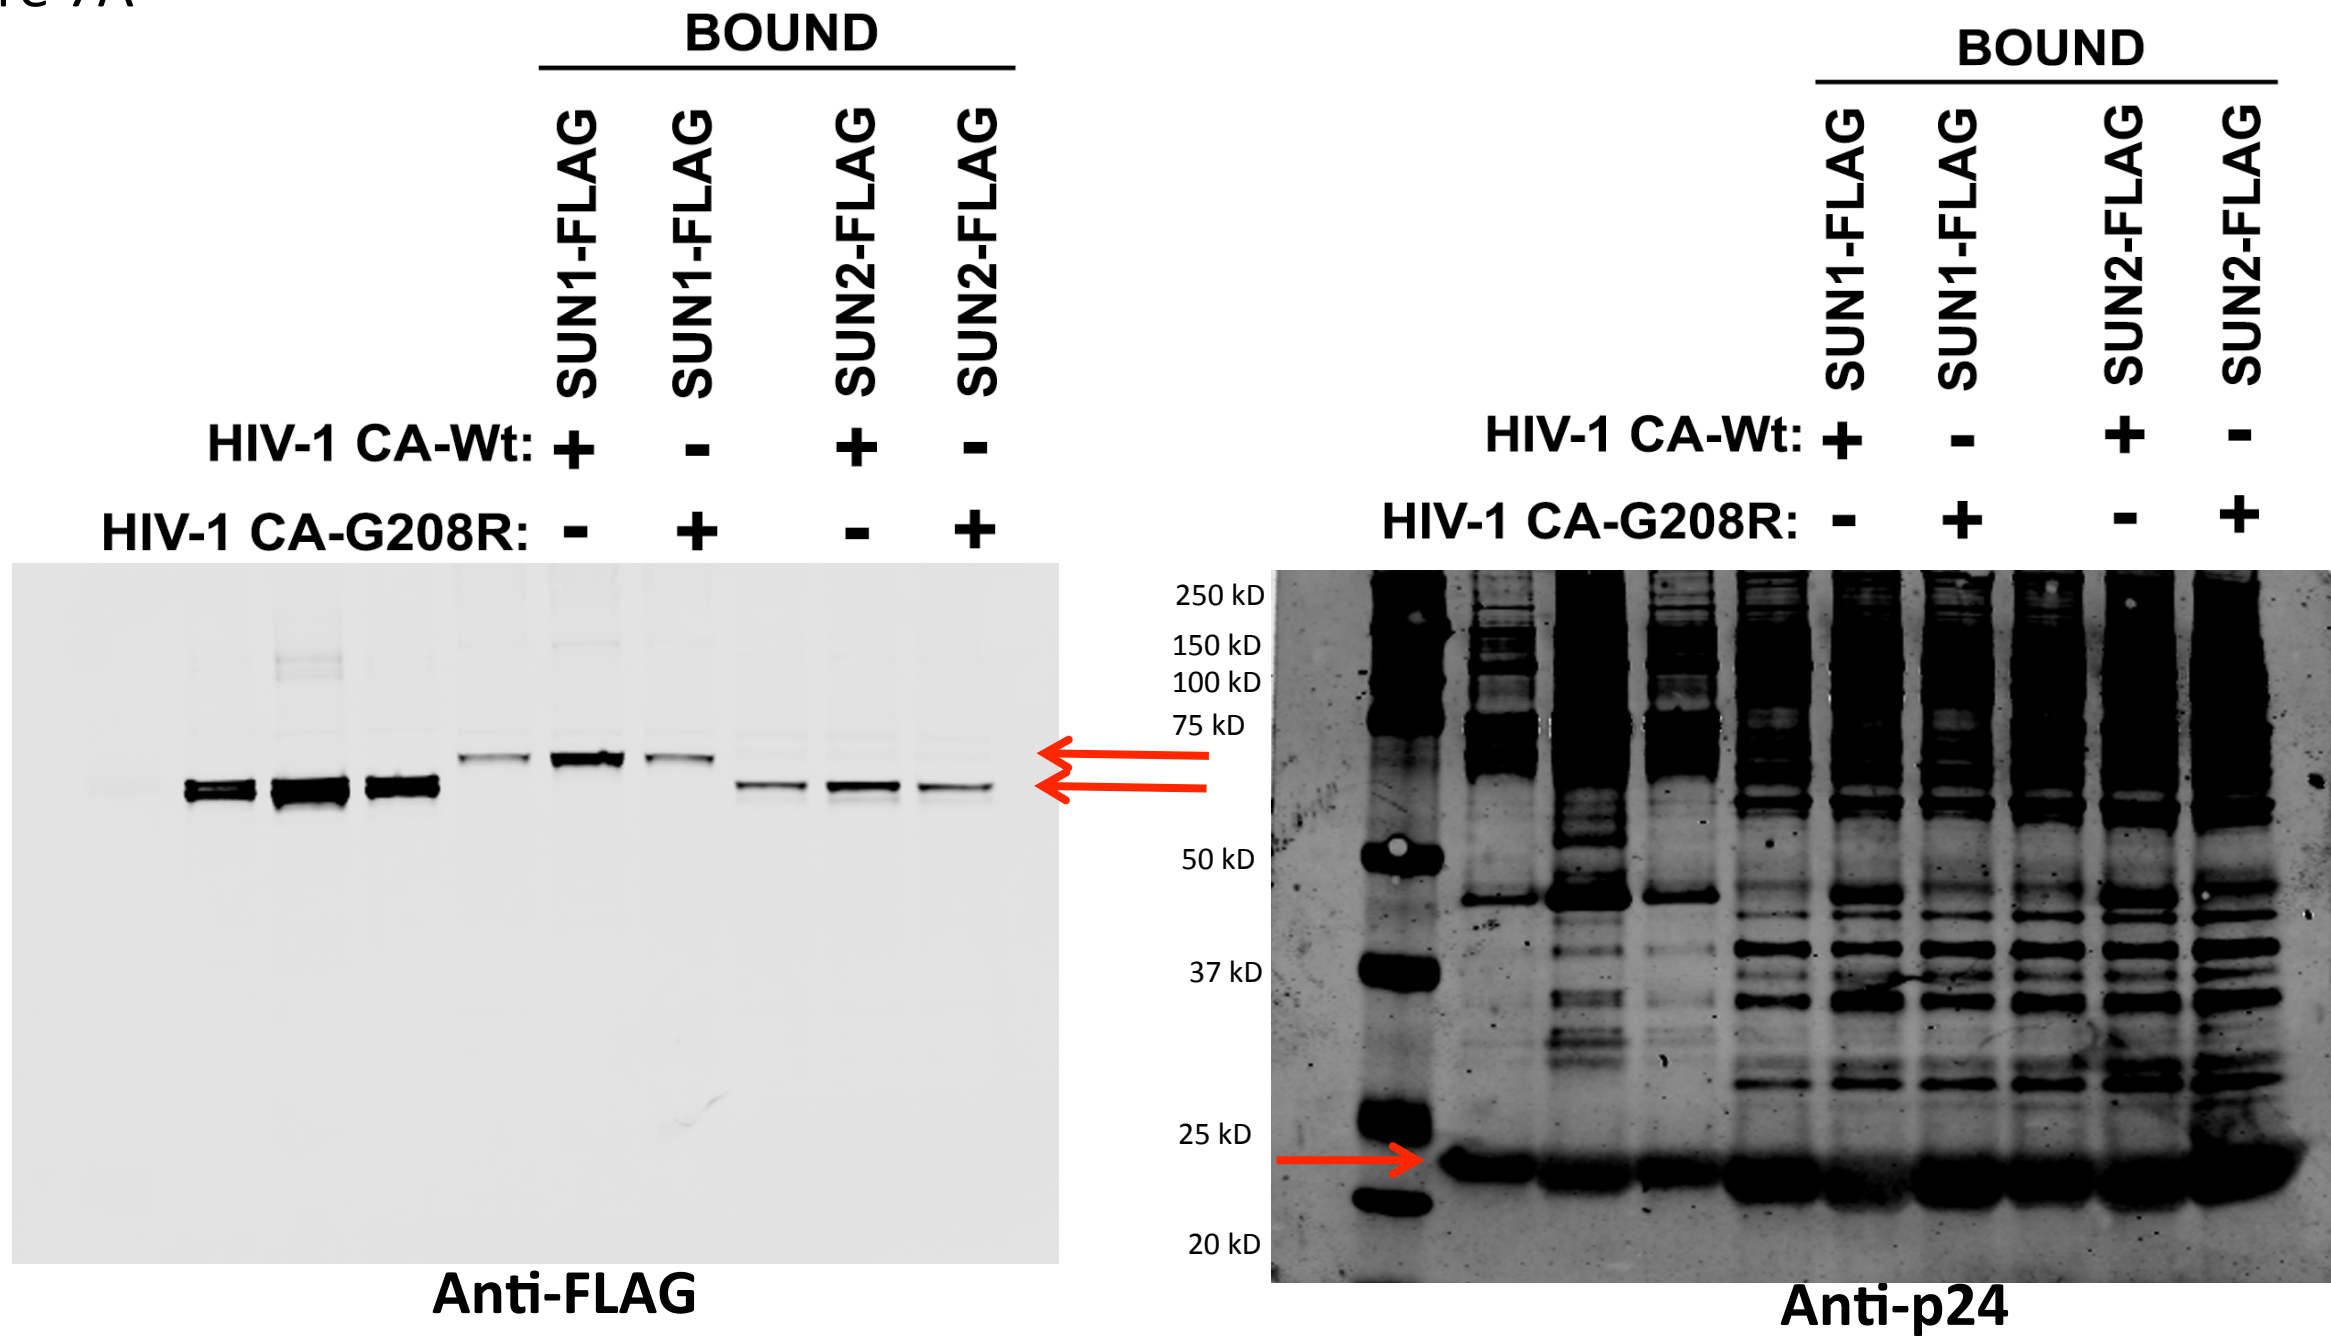

Figure 7A

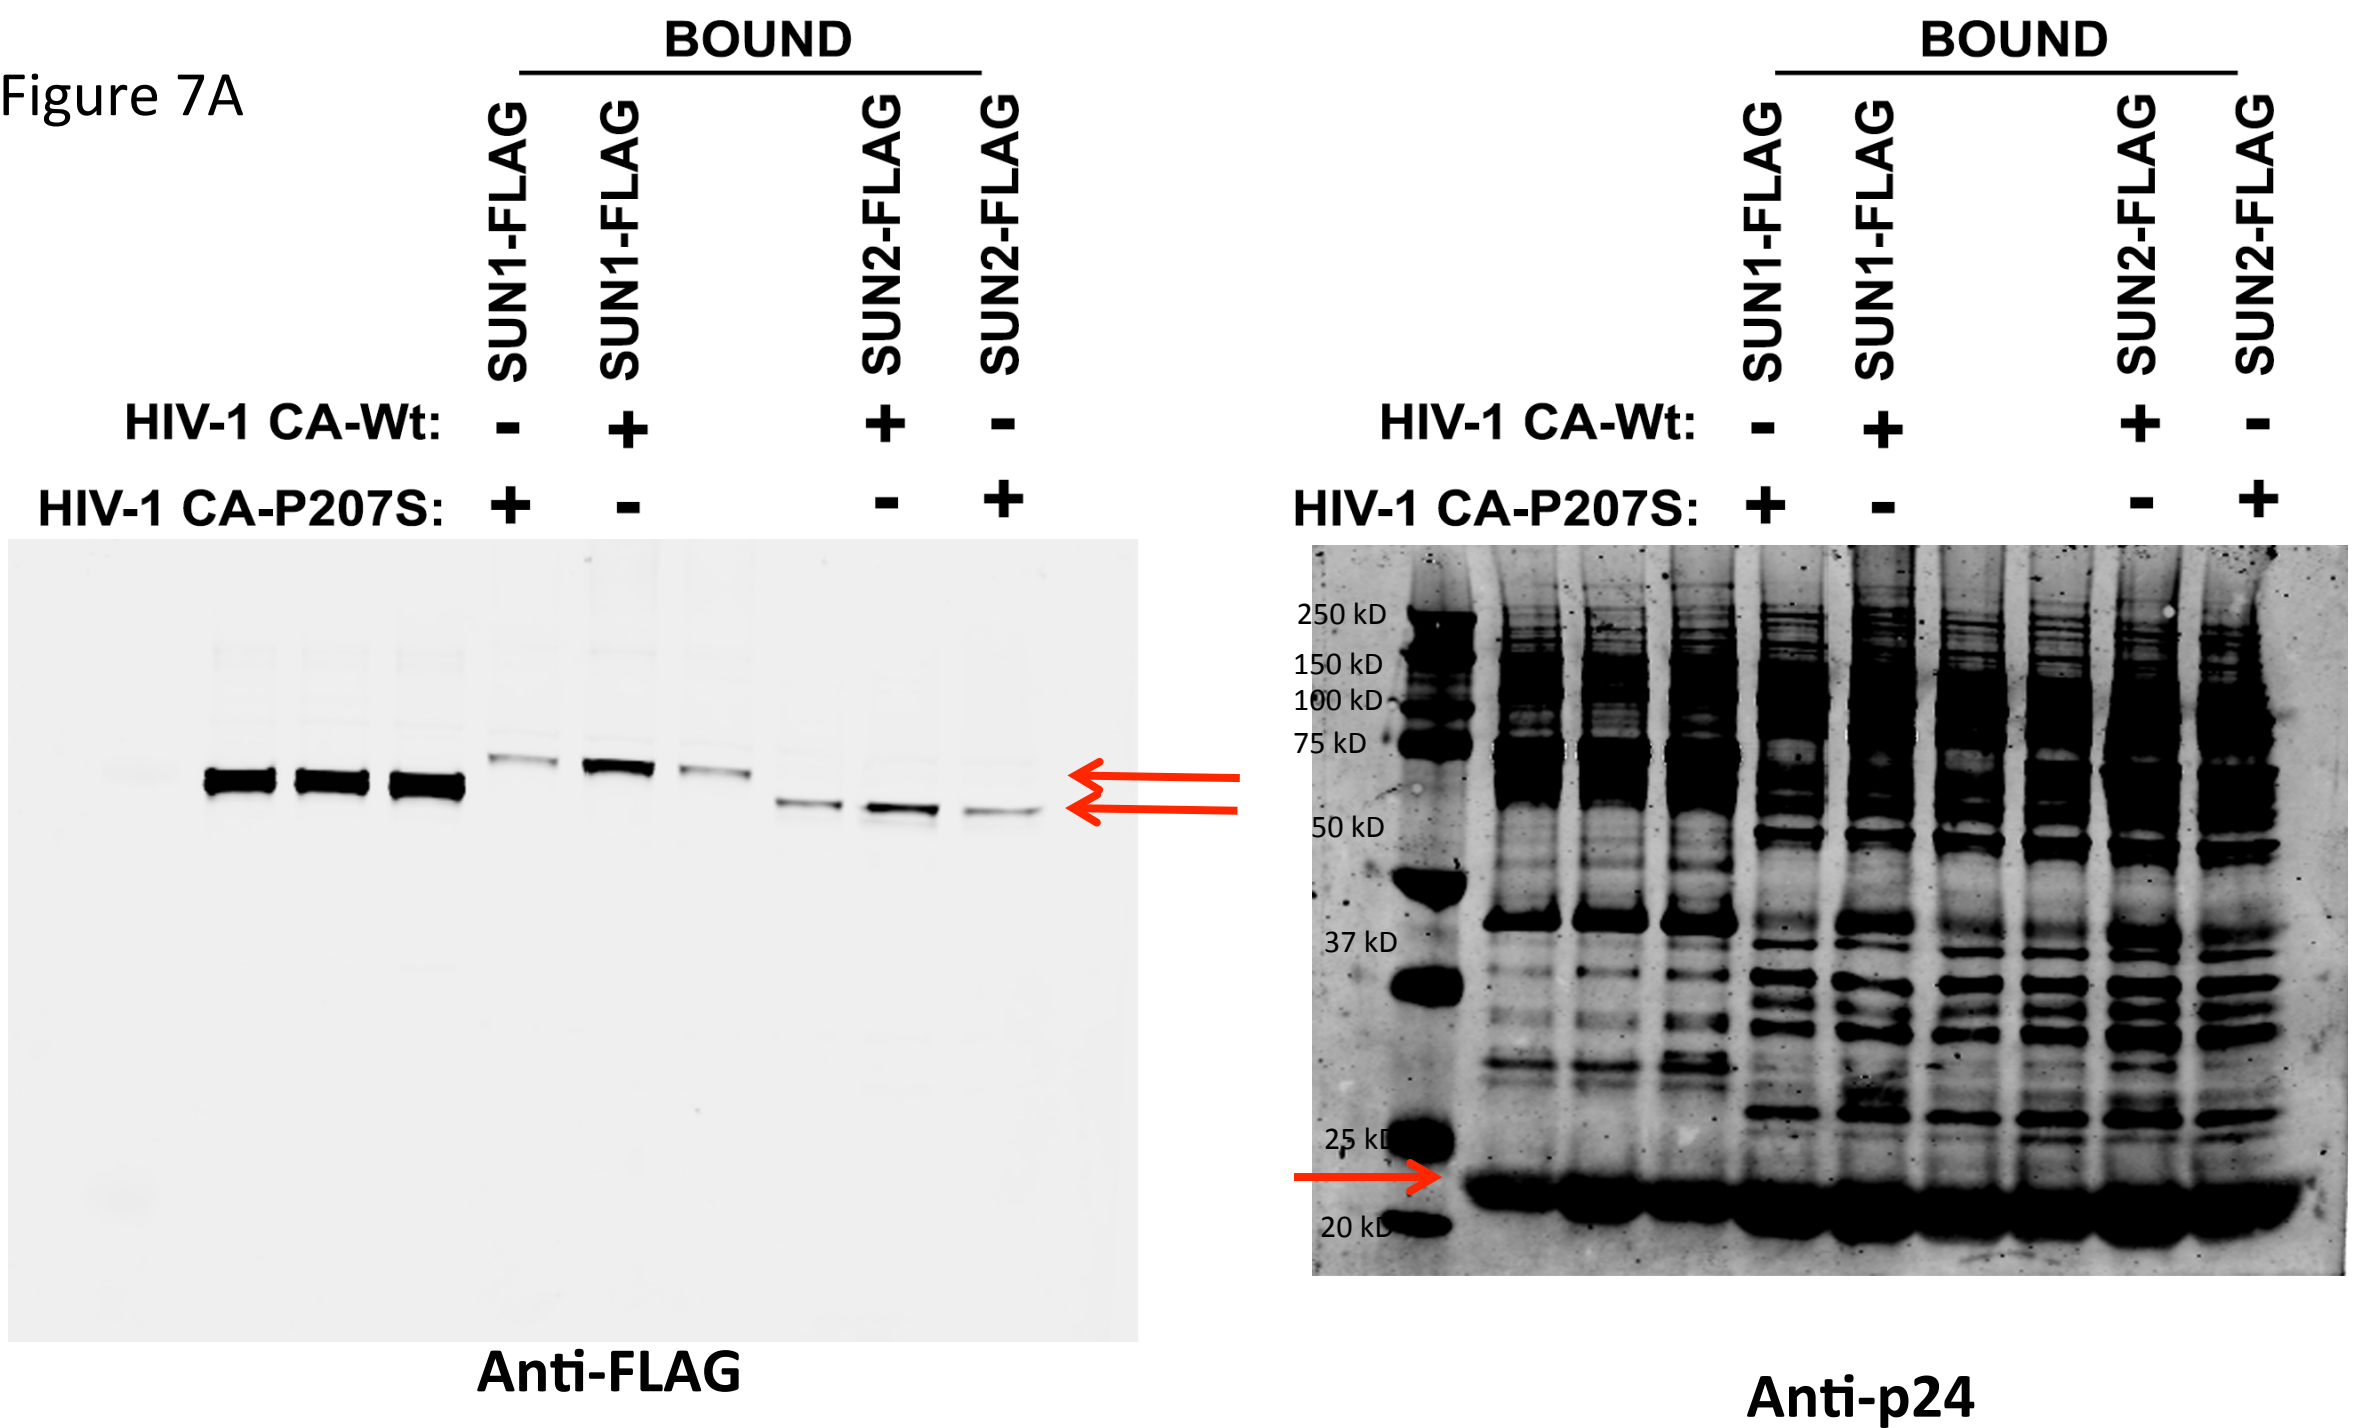

Figure 7B

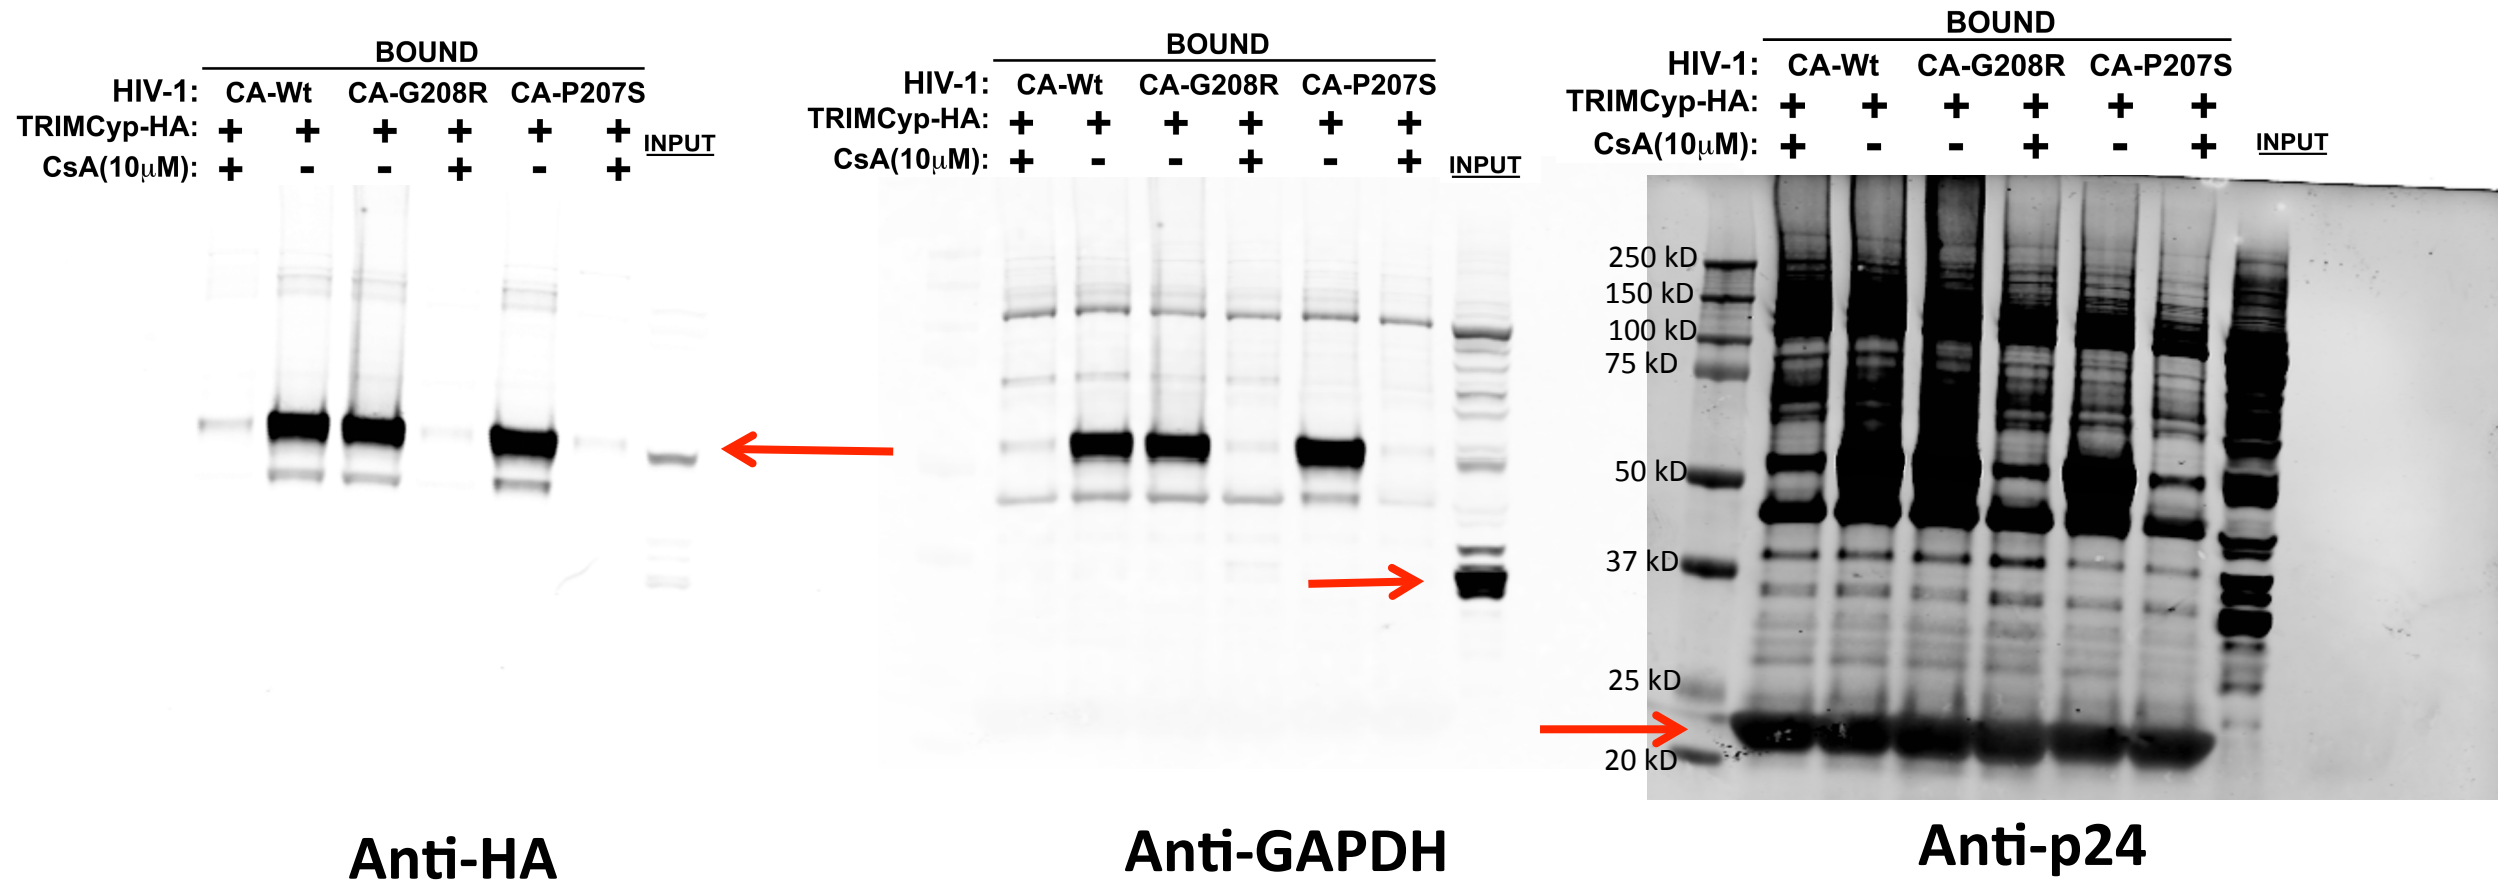

Figure 9

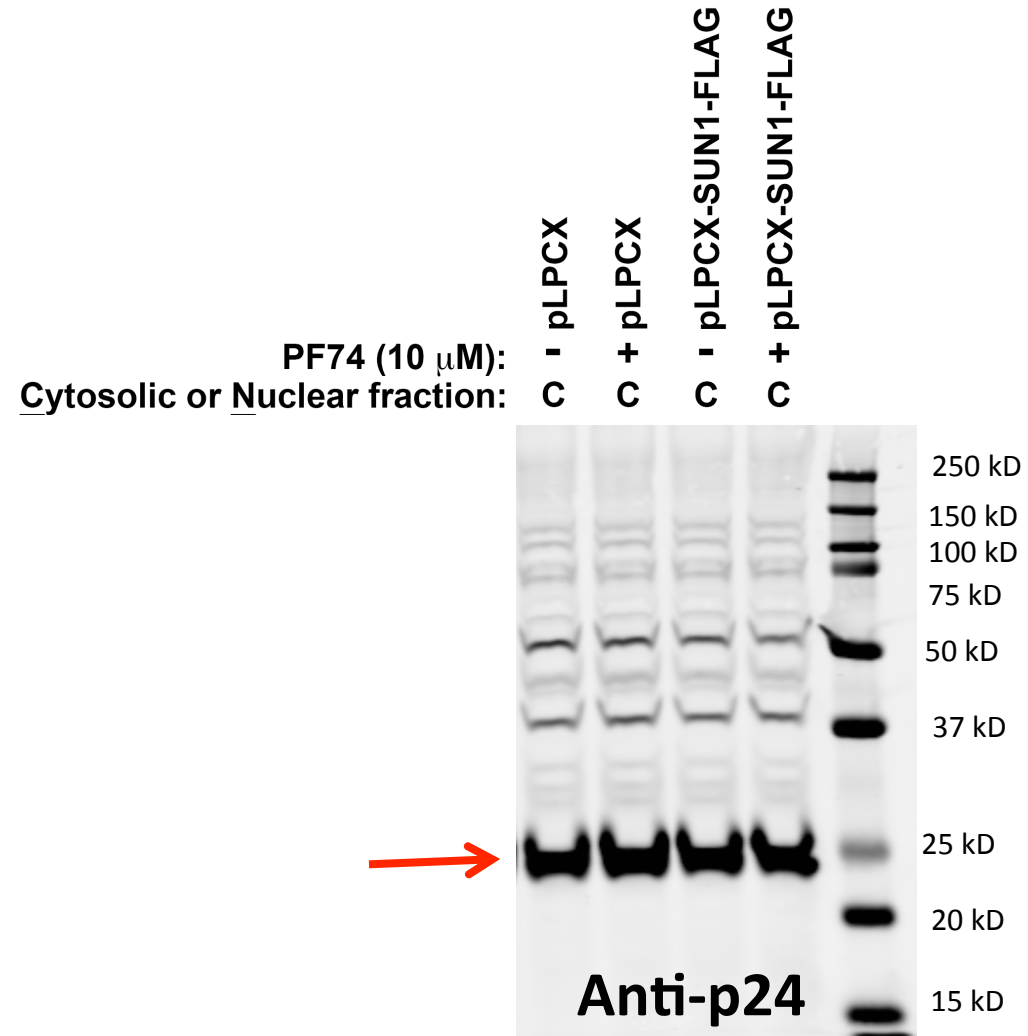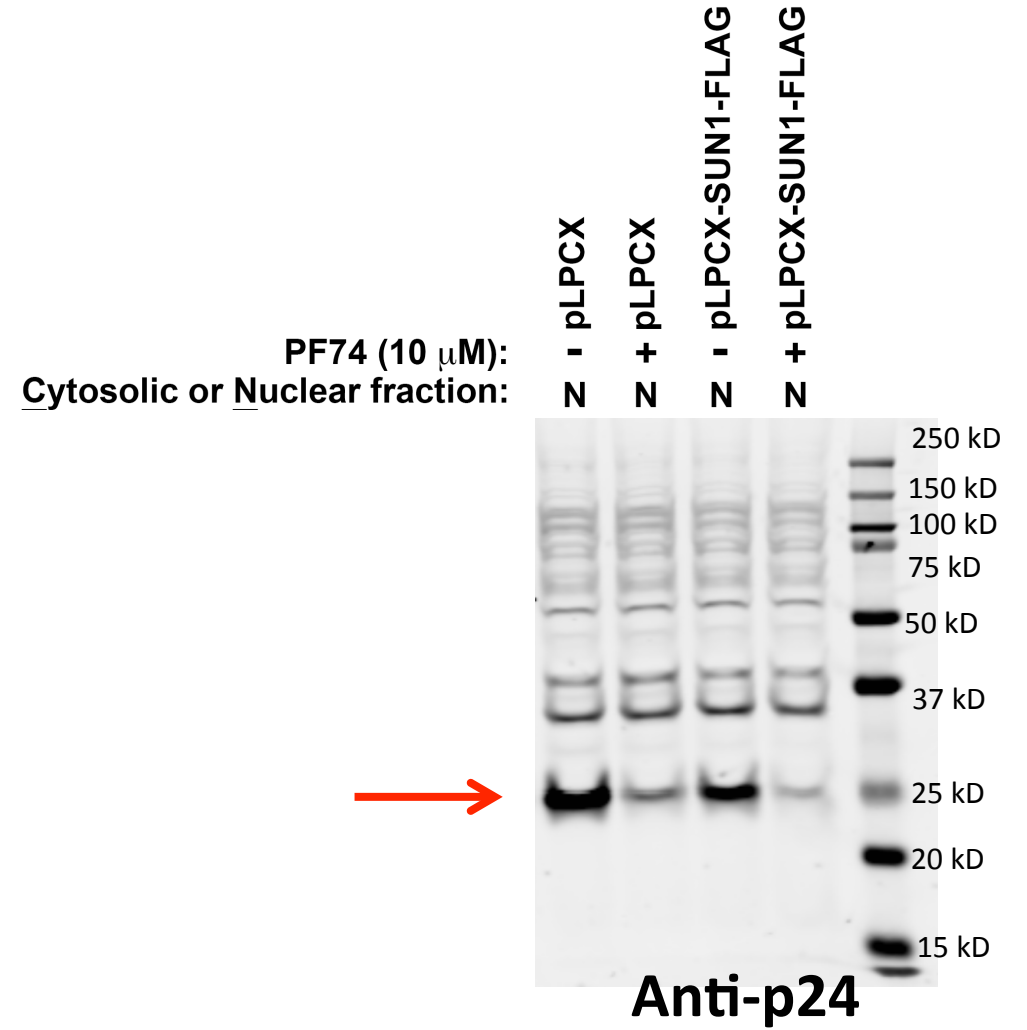

Figure 9

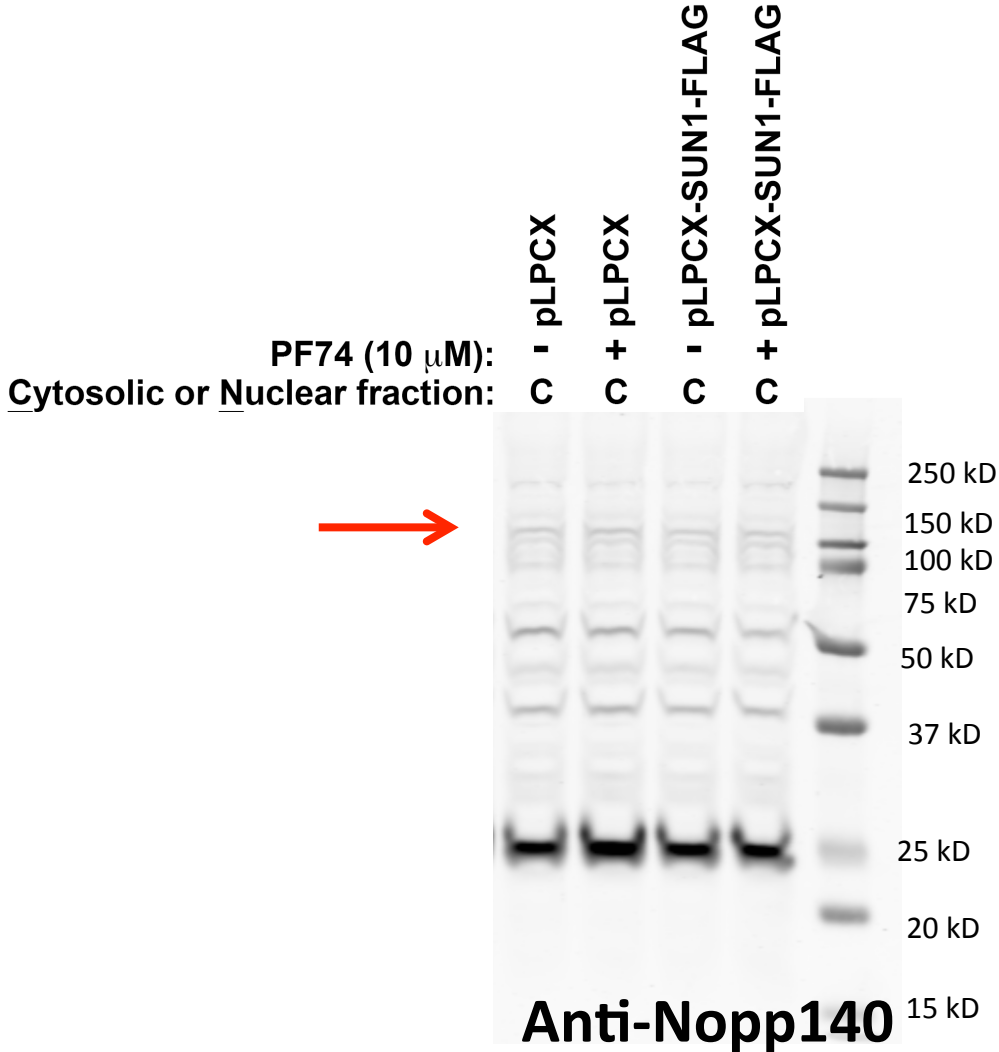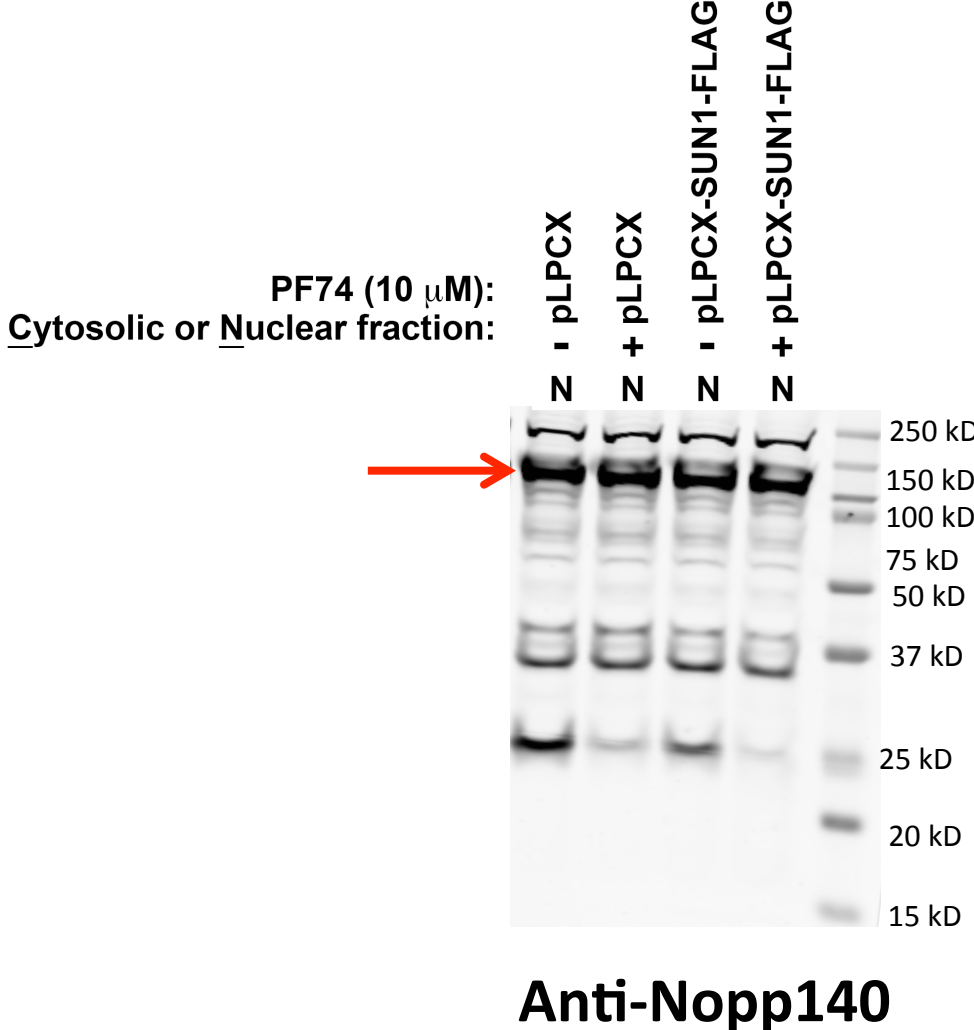



Figure 9

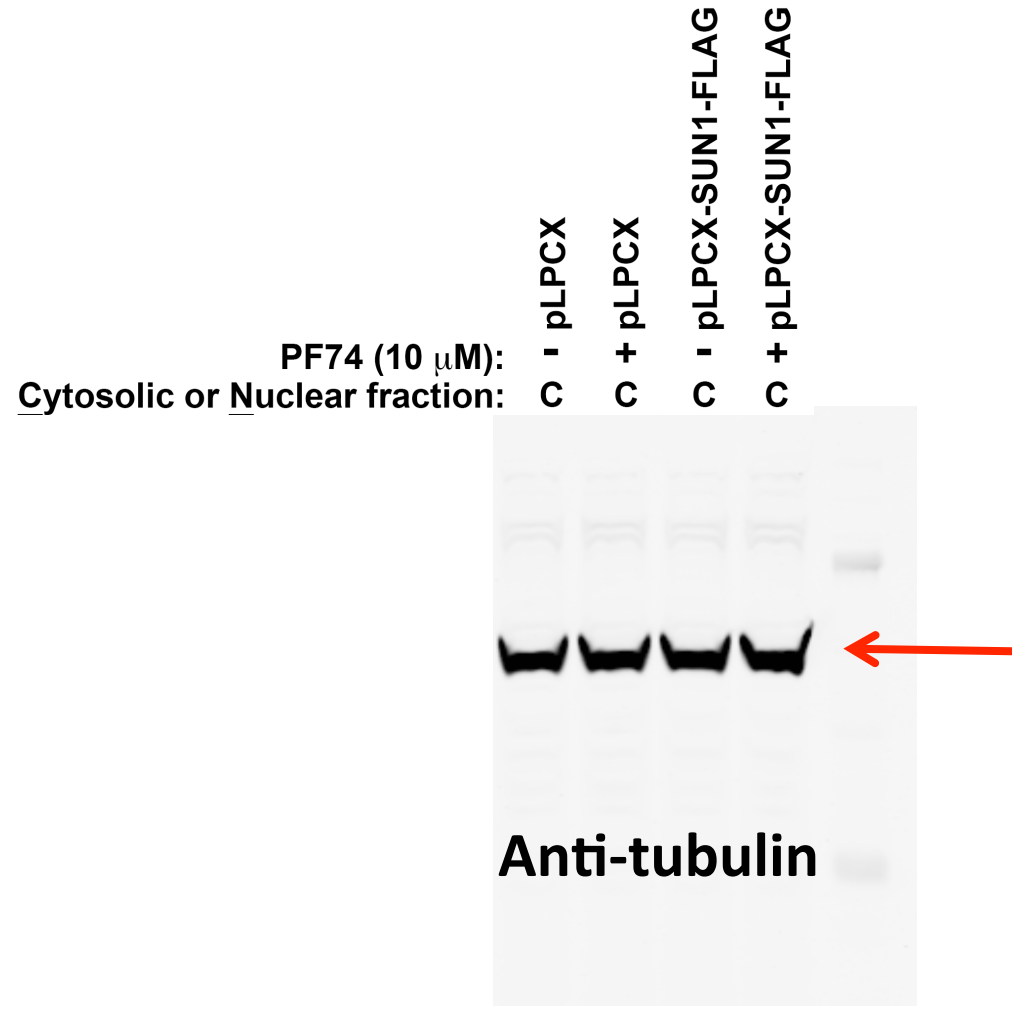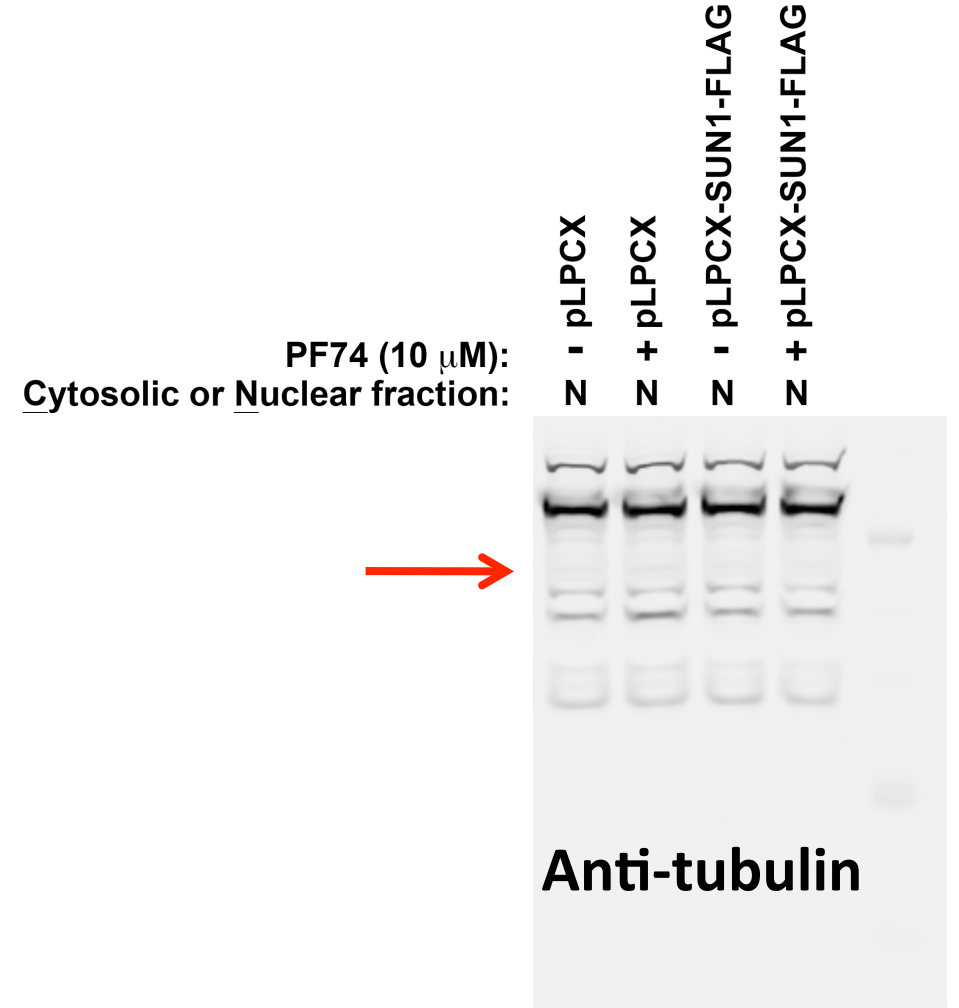

Figure 10B

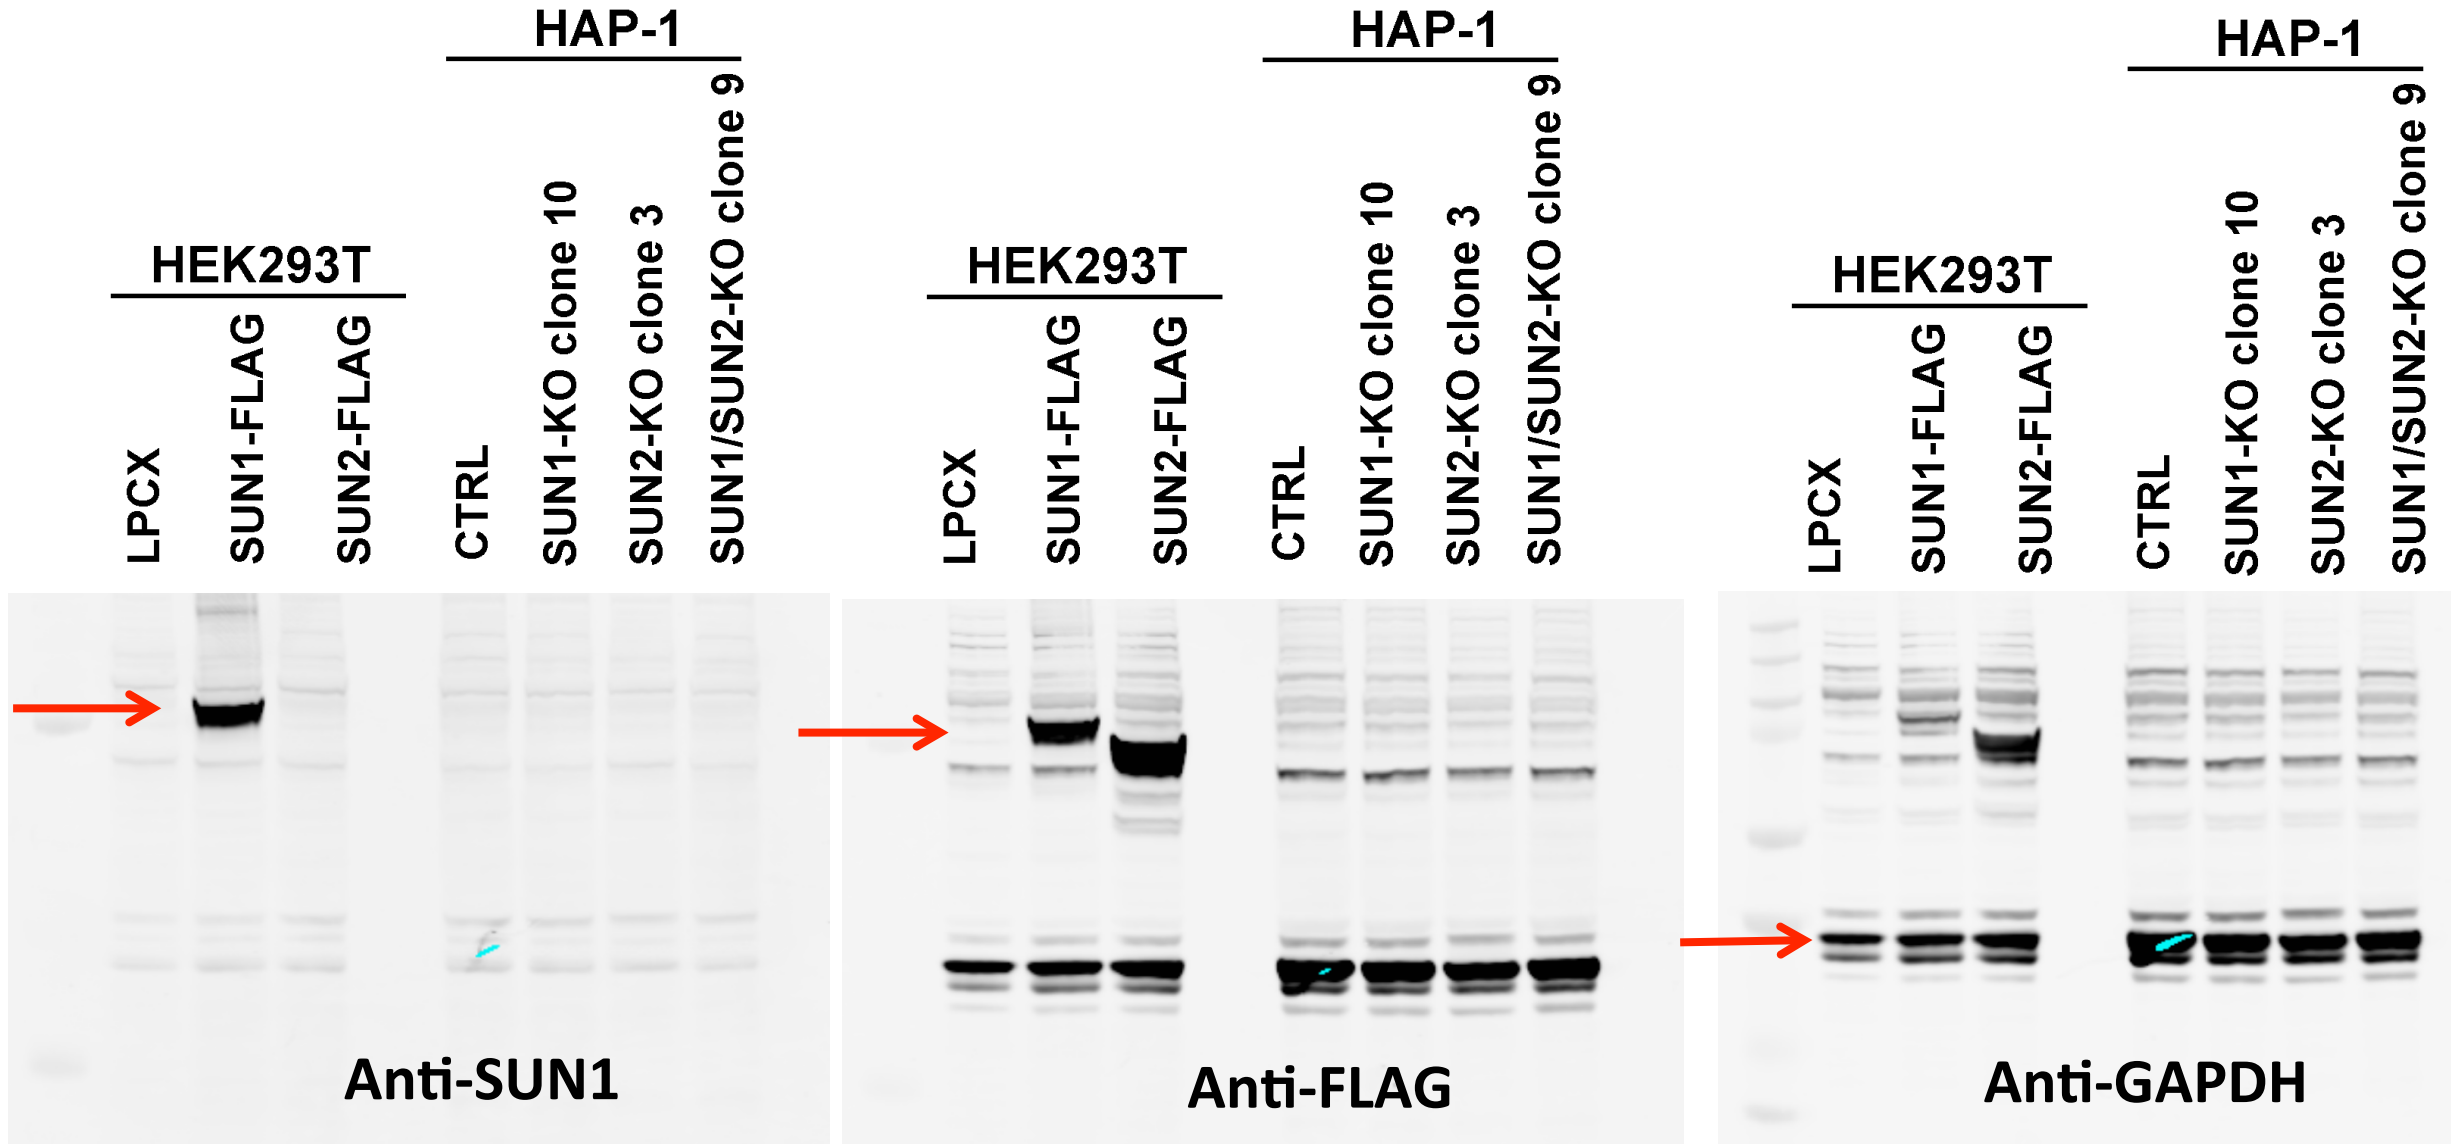

Figure 10B

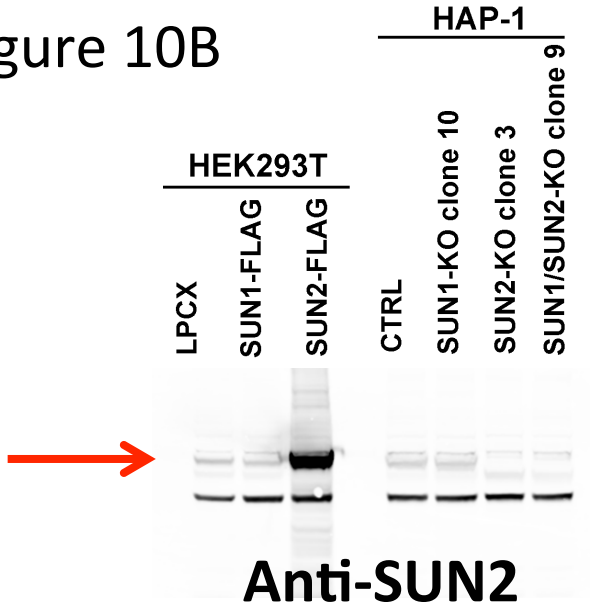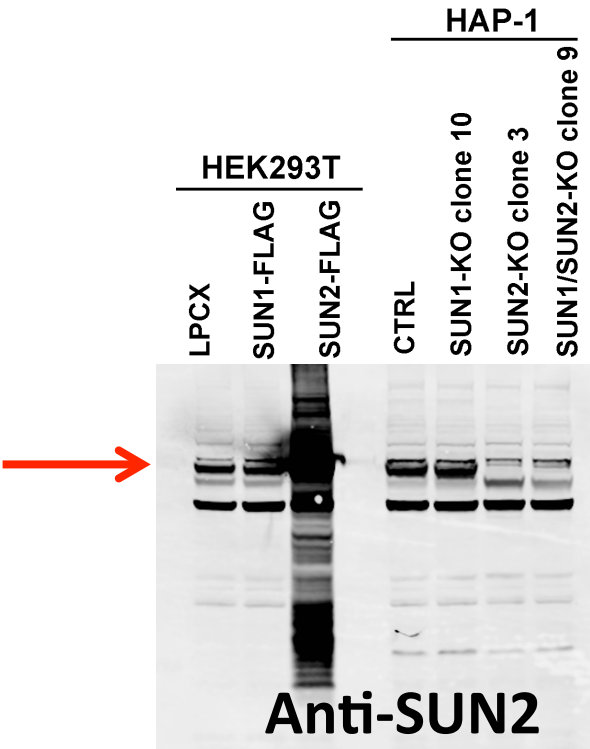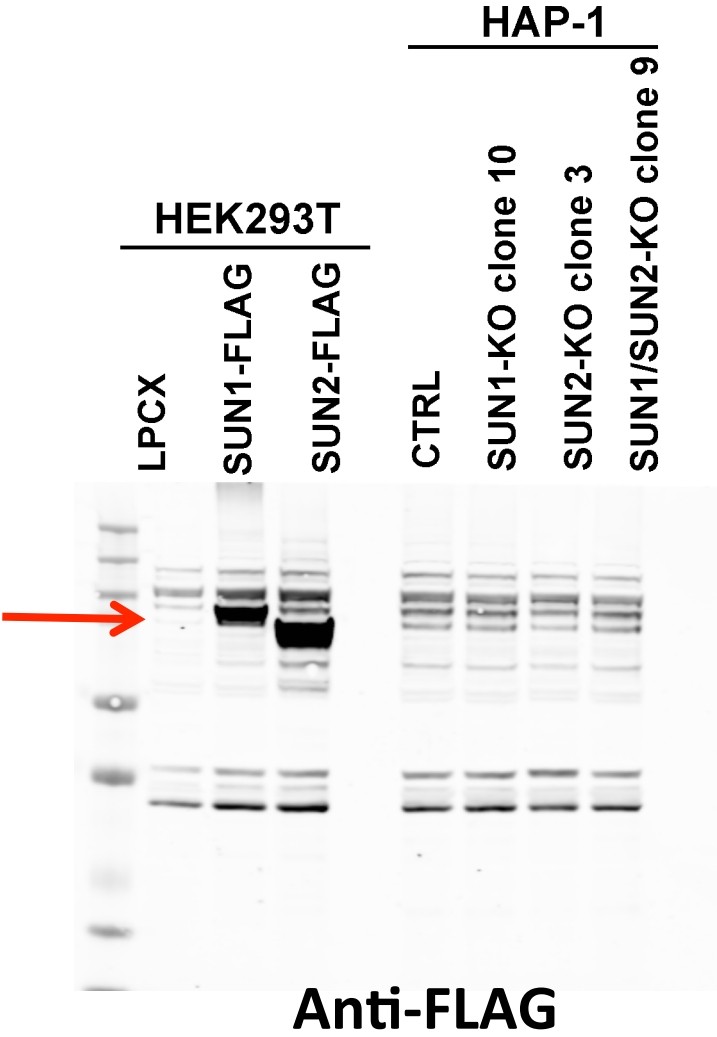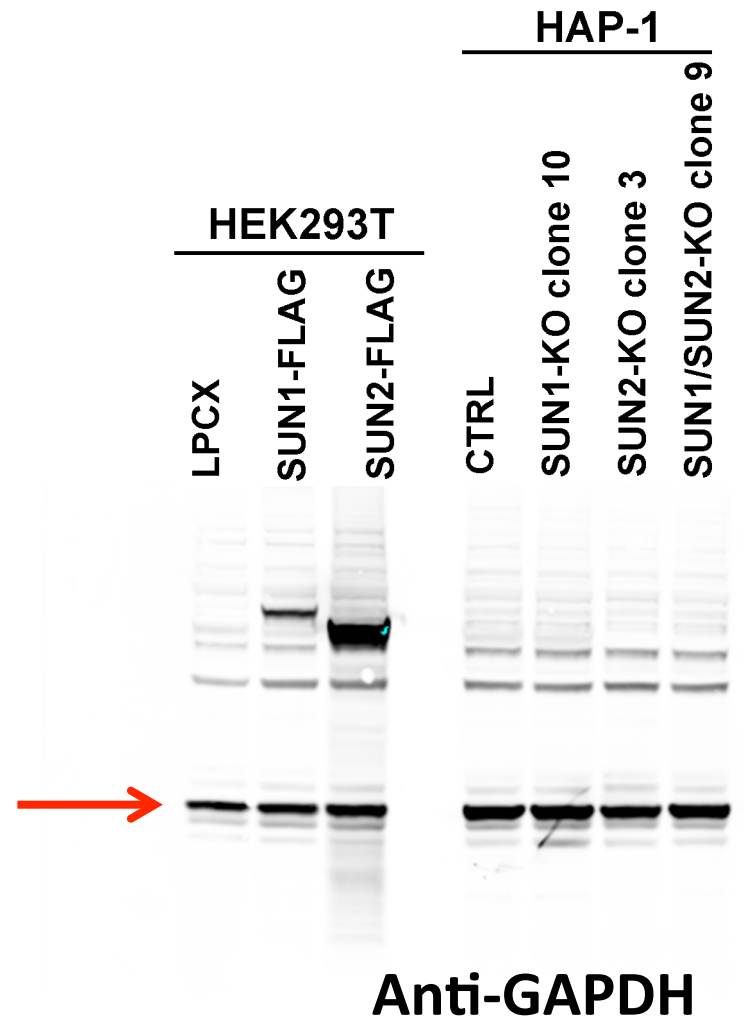

Supplement: 41598_2021_98541_MOESM1_ESM.pdf [file 41598_2021_98541_MOESM1_ESM.pdf]
